# Supplementary material for: LINC00467 Is Upregulated by DNA Copy Number Amplification and Hypomethylation and Shows ceRNA Potential in Lung Adenocarcinoma
Source: Front Endocrinol (Lausanne). 2022 Jan 13;12:802463. doi: 10.3389/fendo.2021.802463 (PMC8792904; doi:10.3389/fendo.2021.802463)
Supplement: Supplementary file 2 [file Table_2.xlsx]

## Sheet: Figure 3A
Non-Tumor	Tumor
0.1577	0.1562
0.1657	0.1509
0.1887	0.201
0.1653	0.1574
0.1717	0.2095
0.157	0.136
0.1757	0.1574
0.1618	0.1643
0.1741	0.1861
0.1694	0.1567
0.168	0.1655
0.2034	0.1648
0.1941	0.1516
0.1821	0.1679
0.1831	0.1411
0.1783	0.1272
0.2052	0.1236
0.2322	0.1229
0.1845	0.1604
0.2028	0.209
0.1959	0.16
0.1706	0.2019
0.1854	0.1749
0.1895	0.1583
0.1638	0.1431
0.1647	0.1593
0.1783	0.1664
0.2185	0.1777
0.2113	0.191
0.1742	0.173
0.195	0.1729
0.203	0.1406
	0.1972
	0.1444
	0.1754
	0.168
	0.1582
	0.1538
	0.1672
	0.2023
	0.1312
	0.183
	0.1575
	0.2011
	0.2047
	0.1435
	0.2019
	0.1666
	0.1978
	0.192
	0.2036
	0.1403
	0.2078
	0.1328
	0.1012
	0.157
	0.2049
	0.1686
	0.1653
	0.1625
	0.2067
	0.1733
	0.1471
	0.2013
	0.1941
	0.2049
	0.1668
	0.1679
	0.1416
	0.1842
	0.1746
	0.1882
	0.1652
	0.1758
	0.1766
	0.1484
	0.1497
	0.176
	0.171
	0.1781
	0.1548
	0.1526
	0.1602
	0.1574
	0.1815
	0.1453
	0.1922
	0.1893
	0.1748
	0.207
	0.1769
	0.1913
	0.1653
	0.1752
	0.1931
	0.2101
	0.1202
	0.1792
	0.1474
	0.1395
	0.168
	0.1876
	0.1521
	0.1367
	0.1434
	0.1632
	0.1218
	0.2455
	0.1712
	0.1419
	0.19
	0.1976
	0.1712
	0.1456
	0.1546
	0.1712
	0.1757
	0.152
	0.1637
	0.1464
	0.1846
	0.2077
	0.1427
	0.1501
	0.1876
	0.1781
	0.1909
	0.1809
	0.1655
	0.1073
	0.1942
	0.1949
	0.2321
	0.1876
	0.1887
	0.1828
	0.2038
	0.1945
	0.1811
	0.1772
	0.1808
	0.1579
	0.1873
	0.1579
	0.1532
	0.1901
	0.2331
	0.1794
	0.1722
	0.1596
	0.1549
	0.1541
	0.2168
	0.1842
	0.1608
	0.151
	0.1583
	0.1528
	0.1701
	0.1337
	0.1733
	0.1607
	0.1525
	0.2043
	0.1789
	0.1443
	0.1404
	0.1766
	0.1819
	0.1654
	0.1492
	0.136
	0.1369
	0.1861
	0.1727
	0.1409
	0.1776
	0.1946
	0.2131
	0.1615
	0.187
	0.2073
	0.1409
	0.1499
	0.1841
	0.1937
	0.1742
	0.1699
	0.1388
	0.1506
	0.1705
	0.1517
	0.1782
	0.1905
	0.1701
	0.2032
	0.2078
	0.1685
	0.173
	0.1891
	0.209
	0.198
	0.1338
	0.1796
	0.1637
	0.1515
	0.1574
	0.1454
	0.1474
	0.1783
	0.1437
	0.1797
	0.1453
	0.1529
	0.1818
	0.2063
	0.2021
	0.164
	0.2094
	0.1616
	0.1802
	0.1662
	0.1533
	0.1682
	0.1144
	0.1525
	0.1952
	0.1476
	0.1744
	0.1453
	0.1393
	0.209
	0.1677
	0.1344
	0.1772
	0.1478
	0.1685
	0.1437
	0.1345
	0.1729
	0.2014
	0.1777
	0.1378
	0.1844
	0.168
	0.1877
	0.1826
	0.1805
	0.1693
	0.1325
	0.1779
	0.165
	0.1403
	0.1676
	0.1523
	0.2063
	0.1835
	0.1936
	0.1768
	0.1526
	0.1729
	0.2261
	0.1144
	0.1584
	0.1593
	0.1743
	0.1779
	0.1534
	0.1909
	0.1738
	0.1937
	0.1451
	0.1726
	0.1556
	0.1406
	0.2002
	0.1769
	0.1267
	0.1988
	0.1367
	0.1546
	0.1964
	0.1191
	0.1255
	0.149
	0.1642
	0.1336
	0.1708
	0.1531
	0.1732
	0.2053
	0.1465
	0.1616
	0.2032
	0.1645
	0.1561
	0.1513
	0.1773
	0.1261
	0.1675
	0.186
	0.1385
	0.1762
	0.1331
	0.2012
	0.1567
	0.1432
	0.1991
	0.1437
	0.1964
	0.1548
	0.2128
	0.1835
	0.1583
	0.1805
	0.1785
	0.1478
	0.1246
	0.1484
	0.1562
	0.1331
	0.1332
	0.1483
	0.1882
	0.166
	0.1896
	0.173
	0.1398
	0.1344
	0.1576
	0.1736
	0.1592
	0.1543
	0.2053
	0.1608
	0.1771
	0.1437
	0.1927
	0.1986
	0.1563
	0.1761
	0.1872
	0.1907
	0.1807
	0.19
	0.2092
	0.1938
	0.1554
	0.1522
	0.1821
	0.2092
	0.1577
	0.1629
	0.147
	0.1847
	0.2031
	0.3636
	0.1814
	0.194
	0.166
	0.1933
	0.1712
	0.177
	0.16
	0.1736
	0.182
	0.1419
	0.1429
	0.1499
	0.186
	0.1435
	0.1726
	0.1526
	0.1556
	0.1484
	0.1671
	0.1627
	0.1534
	0.1545
	0.1837
	0.1951
	0.1662
	0.1343
	0.1461
	0.1526
	0.1352
	0.1926
	0.155
	0.1699
	0.1584
	0.1857
	0.1417
	0.1711
	0.1789
	0.2208
	0.1562
	0.159
	0.1643
	0.1471
	0.1684
	0.1589
	0.1727
	0.1767
	0.1406
	0.1946
	0.1395
	0.1703
	0.1642
	0.1398
	0.1398
	0.1805
	0.1759
	0.1924
	0.1466
	0.2006
	0.2262
	0.1916
	0.1321
	0.1336
	0.1555
	0.1409
	0.1521
	0.1273
	0.1459
	0.1584
	0.1862
	0.1994
	0.1642
	0.1732
	0.226
	0.1542
	0.1449
	0.1568
	0.1919
	0.2019
	0.156
	0.1579
	0.1856
	0.1927
	0.1673
	0.1771
	0.2087
	0.1608
	0.1189
	0.1591
	0.1647
	0.1362
	0.1551
	0.1756
	0.1999
	0.1688
	0.1816
	0.111
	0.1788
	0.1486

## Sheet: Figure 3B
sample	LINC00467 methylation	LINC00467 expression
TCGA-63-A5MP-01	0.4363	1.696
TCGA-91-A4BC-01	0.3757	1.805
TCGA-68-8251-01	0.3552	2.509
TCGA-77-8009-01	0.3093	1.503
TCGA-96-A4JL-01	0.2856	3.136
TCGA-77-A5FZ-01	0.2779	2.919
TCGA-22-5479-01	0.271	1.281
TCGA-90-7769-01	0.2652	0.2696
TCGA-85-6798-01	0.2639	2.07
TCGA-50-6592-01	0.263	2.267
TCGA-L9-A443-01	0.2578	5.041
TCGA-49-4488-11	0.256
TCGA-MP-A4T4-01	0.2543	3.185
TCGA-55-7574-01	0.253	2.868
TCGA-55-6979-01	0.2527	2.887
TCGA-75-6205-01	0.2515	2.395
TCGA-56-7582-01	0.2509	1.43
TCGA-58-A46M-01	0.2492	3.144
TCGA-L3-A524-01	0.2488	2.895
TCGA-97-A4LX-01	0.2478	4.316
TCGA-77-7141-01	0.2473	3.565
TCGA-55-8301-01	0.2463	2.82
TCGA-50-5066-02	0.246	3.928
TCGA-58-A46N-01	0.2454	1.915
TCGA-77-8144-01	0.2448	4.109
TCGA-56-6545-01	0.2443	1.575
TCGA-85-8072-01	0.2419	2.75
TCGA-98-A53I-01	0.2415	2.951
TCGA-55-8506-01	0.2407	4.715
TCGA-50-6592-11	0.2397
TCGA-50-5051-01	0.2393	4.435
TCGA-91-6831-01	0.2386	3.112
TCGA-38-4632-01	0.2385	3.929
TCGA-91-6848-01	0.2382	3.105
TCGA-86-8671-01	0.2372	2.744
TCGA-75-5122-01	0.2368	2.616
TCGA-44-6775-01	0.2367	3.229
TCGA-44-7659-01	0.2362	4.461
TCGA-33-4583-01	0.235	3.684
TCGA-44-7672-01	0.2349	3.589
TCGA-62-A46U-01	0.2348	3.519
TCGA-85-6561-01	0.2347	1.596
TCGA-50-6593-11	0.2338
TCGA-55-A48X-01	0.2333	4.273
TCGA-44-6779-01	0.2329	4.579
TCGA-38-7271-01	0.2316	3.332
TCGA-63-A5MJ-01	0.231	3.588
TCGA-MP-A4TJ-01	0.2309	2.711
TCGA-44-7661-01	0.2307	3.128
TCGA-83-5908-01	0.2302	2.686
TCGA-86-7711-01	0.2302	2.022
TCGA-44-A479-01	0.2297	2.458
TCGA-55-7728-01	0.2292	2.605
TCGA-69-7978-01	0.2291	3.218
TCGA-63-A5MG-01	0.2289	2.187
TCGA-44-A47G-01	0.2287	3.263
TCGA-49-4490-01	0.2284	3.882
TCGA-50-5931-01	0.2279	4.382
TCGA-21-5786-01	0.2279	2.994
TCGA-77-8150-01	0.2279	0.464
TCGA-O2-A5IC-01	0.2279
TCGA-55-A493-01	0.2278	3.394
TCGA-49-4488-01	0.2276	4.392
TCGA-85-8666-01	0.2275	2.781
TCGA-63-A5MB-01	0.2273	1.857
TCGA-92-8064-01	0.227	1.787
TCGA-62-A46Y-01	0.2268	3.617
TCGA-99-8028-01	0.2266	3.55
TCGA-94-8491-01	0.2264	3.485
TCGA-44-6778-11	0.2263	2.227
TCGA-91-6835-01	0.2261	2.598
TCGA-49-4487-01	0.2257	3.316
TCGA-05-4410-01	0.2253	4.336
TCGA-43-6770-01	0.2252	4.116
TCGA-78-7155-01	0.2249	3.631
TCGA-73-4676-11	0.2249	2.988
TCGA-44-7670-01	0.2247	3.627
TCGA-55-8511-01	0.2246	2.982
TCGA-85-A5B5-01	0.2241	2.672
TCGA-44-4112-01	0.2238	4.729
TCGA-55-6978-01	0.2235	2.488
TCGA-L9-A444-01	0.2232	3.258
TCGA-67-6216-01	0.2224	3.727
TCGA-44-6144-11	0.2223	2.669
TCGA-44-7667-01	0.2222	2.914
TCGA-34-5241-01	0.2216	4.132
TCGA-J2-A4AG-01	0.2215	3.769
TCGA-68-7755-01	0.2214	2.562
TCGA-86-A4D0-01	0.2213	4.419
TCGA-44-3918-01	0.2211	3.575
TCGA-50-5931-11	0.2211	2.652
TCGA-56-A4BY-01	0.221	2.372
TCGA-50-5066-01	0.2209	4.675
TCGA-MP-A4TA-01	0.2206	4.44
TCGA-55-6981-01	0.2205	3.945
TCGA-05-4396-01	0.2205	3.706
TCGA-55-8299-01	0.2204	3.948
TCGA-05-4425-01	0.2204	3.523
TCGA-97-8172-01	0.2204	3.14
TCGA-86-A456-01	0.2202	3.623
TCGA-52-7622-01	0.2201	2.525
TCGA-73-4658-11	0.2201
TCGA-44-7669-01	0.2199	4.11
TCGA-NJ-A55A-01	0.2199	3.925
TCGA-37-A5EL-01	0.2197	3.872
TCGA-49-6745-01	0.2196	2.673
TCGA-44-5645-01	0.2192	3.46
TCGA-L4-A4E6-01	0.2192	2.445
TCGA-39-5036-01	0.2191	3.081
TCGA-56-8629-01	0.2191	2.599
TCGA-93-7347-01	0.219	3.287
TCGA-60-2709-01	0.2189	2.551
TCGA-55-6984-01	0.2187	3.387
TCGA-55-5899-01	0.2186	4.796
TCGA-50-5930-01	0.2185	1.97
TCGA-55-6980-01	0.2184	4.299
TCGA-86-6851-01	0.2183	2.946
TCGA-50-5045-01	0.2182	3.7
TCGA-50-5930-11	0.2182	2.477
TCGA-55-6969-01	0.2181	3.188
TCGA-55-7573-01	0.218	3.136
TCGA-55-8205-01	0.2179	2.972
TCGA-91-8499-01	0.2177	4.25
TCGA-NC-A5HL-01	0.2176	3.712
TCGA-55-6983-01	0.2174	3.687
TCGA-55-A48Y-01	0.217	3.293
TCGA-55-A492-01	0.2168	6.297
TCGA-55-6712-01	0.2168	3.405
TCGA-97-7553-01	0.2166	3.452
TCGA-33-AASJ-01	0.2166	2.91
TCGA-77-A5G3-01	0.2166	2.503
TCGA-MP-A4T9-01	0.2164	3.025
TCGA-77-8156-01	0.2159	2.145
TCGA-78-7148-01	0.2157	4.3
TCGA-55-A4DF-01	0.2157	3.003
TCGA-MP-A4SW-01	0.2155	4.373
TCGA-85-A4PA-01	0.2154	2.933
TCGA-56-8082-01	0.2153	3.359
TCGA-80-5607-01	0.2151	3.394
TCGA-55-8510-01	0.2151	2.929
TCGA-75-5126-01	0.2151	2.847
TCGA-22-5473-01	0.215	2.494
TCGA-43-5670-01	0.2149	3.247
TCGA-18-4721-01	0.2149	3.045
TCGA-22-4599-01	0.2148	5.219
TCGA-85-A4JB-01	0.2148	2.382
TCGA-55-6975-01	0.2147	4.454
TCGA-50-5935-11	0.2147	2.736
TCGA-33-4582-11	0.2147
TCGA-62-A46S-01	0.2146	3.121
TCGA-69-A59K-01	0.2145	4.131
TCGA-55-8087-01	0.2144	4.14
TCGA-56-8628-01	0.2142	2.429
TCGA-95-7944-01	0.2141	2.521
TCGA-75-5125-01	0.2138	3.827
TCGA-97-8177-01	0.2137	3.908
TCGA-85-8580-01	0.2135	2.684
TCGA-56-8201-01	0.2135	1.568
TCGA-44-6145-11	0.2134	2.216
TCGA-92-7341-01	0.2132	2.41
TCGA-55-8620-01	0.2131	3.21
TCGA-34-5232-01	0.2128	3.247
TCGA-18-5592-11	0.2128
TCGA-85-A513-01	0.2126	2.672
TCGA-49-6767-01	0.2125	4.628
TCGA-64-5778-01	0.2125	4.388
TCGA-78-8648-01	0.2125	2.103
TCGA-95-7039-01	0.2124	4.701
TCGA-91-6829-01	0.2123	4.089
TCGA-69-7979-01	0.2123	3.86
TCGA-49-6743-01	0.2123	3.09
TCGA-44-6777-01	0.2122	3.77
TCGA-33-AASL-01	0.2122	2.834
TCGA-55-A491-01	0.2118	2.436
TCGA-68-A59J-01	0.2116	2.159
TCGA-69-8255-01	0.2115	4.054
TCGA-86-A4P8-01	0.2115	2.389
TCGA-73-4658-01	0.2114	4.06
TCGA-55-7576-01	0.2114	3.019
TCGA-50-5044-01	0.2113	3.779
TCGA-97-7552-01	0.2113	2.872
TCGA-86-7953-01	0.2108	3.292
TCGA-39-5036-11	0.2108
TCGA-NC-A5HJ-01	0.2105	3.316
TCGA-99-7458-01	0.2102	5.029
TCGA-NJ-A4YQ-01	0.2101	4.857
TCGA-56-8504-01	0.2101	4.388
TCGA-55-7913-01	0.2101	3.139
TCGA-78-7536-01	0.21	3.817
TCGA-50-6595-01	0.2098	2.787
TCGA-78-7152-01	0.2097	3.955
TCGA-91-6830-01	0.2095	4.235
TCGA-85-8355-01	0.2095	2.558
TCGA-98-7454-01	0.2091	2.816
TCGA-MP-A4SV-01	0.209	4.225
TCGA-63-5128-01	0.209	2.212
TCGA-98-A53J-01	0.2089	3.102
TCGA-55-6968-01	0.2087	3.966
TCGA-50-5055-01	0.2086	2.82
TCGA-50-6597-01	0.2085	4.21
TCGA-86-7954-01	0.2085	3.828
TCGA-50-5933-11	0.2084	2.194
TCGA-49-AAQV-01	0.2082	4.909
TCGA-38-4632-11	0.2082	3.874
TCGA-MP-A4TI-01	0.2082	3.833
TCGA-62-8402-01	0.2082	3.448
TCGA-NC-A5HE-01	0.2081	3.668
TCGA-44-2656-01	0.208	4.639
TCGA-77-8007-01	0.208	3.956
TCGA-86-A4P7-01	0.208	3.653
TCGA-55-8505-01	0.208	3.428
TCGA-O2-A52S-01	0.208	2.194
TCGA-53-A4EZ-01	0.2078	3.171
TCGA-85-8584-01	0.2077	4.567
TCGA-J1-A4AH-01	0.2077	2.419
TCGA-62-A471-01	0.2075	3.939
TCGA-55-8089-01	0.2072	3.685
TCGA-68-7757-01	0.2071	2.841
TCGA-50-5933-01	0.207	2.587
TCGA-43-6773-01	0.207	1.588
TCGA-56-8309-01	0.2069	2.908
TCGA-50-5049-01	0.2068	2.541
TCGA-34-5239-01	0.2068	2.383
TCGA-50-5941-01	0.2067	3.705
TCGA-78-8660-01	0.2067	3.162
TCGA-44-3917-01	0.2066
TCGA-55-6985-01	0.2064	3.203
TCGA-49-6745-11	0.2063	3.509
TCGA-78-7167-01	0.2062	4.342
TCGA-75-6214-01	0.2059	3.624
TCGA-49-AAR9-01	0.2056	4.091
TCGA-21-5784-01	0.2056	3.254
TCGA-62-A46R-01	0.2055	4.891
TCGA-J2-A4AD-01	0.2055	4.857
TCGA-98-A53A-01	0.2055	3.81
TCGA-44-6146-11	0.2055	1.819
TCGA-63-A5MW-01	0.2054	3.542
TCGA-55-8208-01	0.2054	2.563
TCGA-50-6591-11	0.2053
TCGA-34-7107-01	0.2052	2.406
TCGA-49-AAR3-01	0.2051	3.937
TCGA-60-2697-01	0.2051	2.837
TCGA-44-6147-11	0.205	2.2
TCGA-93-8067-01	0.2048	3.489
TCGA-55-7994-01	0.2048	2.937
TCGA-79-5596-01	0.2048	1.688
TCGA-63-A5MU-01	0.2047	4.412
TCGA-85-8071-01	0.2047	2.339
TCGA-55-7911-01	0.2046	4.369
TCGA-58-8390-01	0.2046	2.013
TCGA-44-A47A-01	0.2044	4.28
TCGA-97-8547-01	0.2041	3.699
TCGA-39-5040-01	0.2041	2.046
TCGA-63-A5MI-01	0.204	4.317
TCGA-86-8673-01	0.204	3.453
TCGA-44-5643-01	0.204	1.59
TCGA-55-6982-01	0.2039	4.195
TCGA-77-8136-01	0.2039	2.401
TCGA-75-7031-01	0.2038	4.314
TCGA-75-5146-01	0.2032	3.862
TCGA-93-A4JQ-01	0.2032	3.446
TCGA-55-6987-01	0.2031	3.251
TCGA-44-6148-11	0.2031	2.771
TCGA-43-A56U-01	0.2029	2.376
TCGA-86-8076-01	0.2027	3.654
TCGA-43-3920-11	0.2026
TCGA-86-8279-01	0.2025	4.541
TCGA-O2-A52Q-01	0.2025	3.666
TCGA-MP-A4TF-01	0.2024	4.135
TCGA-43-8118-01	0.2024	2.946
TCGA-NC-A5HK-01	0.2023	3.439
TCGA-33-A4WN-01	0.2023	2.483
TCGA-91-8497-01	0.2022	2.714
TCGA-44-2668-01	0.2021	4.145
TCGA-63-A5MS-01	0.2021	3.163
TCGA-93-A4JO-01	0.2021	2.902
TCGA-44-2666-01	0.2019	3.545
TCGA-77-A5GA-01	0.2019	3.433
TCGA-97-7554-01	0.2019	2.658
TCGA-69-7974-01	0.2018	3.235
TCGA-49-AAR4-01	0.2018	3.069
TCGA-55-7815-01	0.2017	3.677
TCGA-91-6847-01	0.2017	2.361
TCGA-50-6594-11	0.2014
TCGA-22-5483-01	0.2013	2.713
TCGA-94-8490-01	0.2009	3.684
TCGA-70-6723-01	0.2008	3.131
TCGA-55-6970-01	0.2006	3.692
TCGA-86-8280-01	0.2005	3.901
TCGA-75-7027-01	0.2005	3.858
TCGA-55-8619-01	0.2005	2.323
TCGA-56-8625-01	0.2004	3.074
TCGA-33-4589-01	0.2003	4.065
TCGA-78-8640-01	0.2002	3.333
TCGA-86-8585-01	0.2001	4.035
TCGA-43-A475-01	0.2001	3.638
TCGA-85-A4CN-01	0.2001	2.059
TCGA-69-8453-01	0.2	3.027
TCGA-55-8096-01	0.1999	4.288
TCGA-55-7281-01	0.1999	4.023
TCGA-50-8460-01	0.1999	3.738
TCGA-NJ-A55R-01	0.1995	4.994
TCGA-MF-A522-01	0.1995	3.692
TCGA-55-8621-01	0.1995	3.184
TCGA-49-AARR-01	0.1995	3.072
TCGA-22-5480-01	0.1995	2.275
TCGA-91-6828-01	0.1994	3.219
TCGA-21-5782-01	0.1994	1.84
TCGA-98-A53H-01	0.1993	3.17
TCGA-78-7542-01	0.1992	3.972
TCGA-56-A4ZK-01	0.199	2.091
TCGA-50-6593-01	0.1989	3.361
TCGA-64-5781-01	0.1988	4.313
TCGA-85-8353-01	0.1987	3.292
TCGA-38-A44F-01	0.1986	3.334
TCGA-95-7948-01	0.1985	3.18
TCGA-58-A46L-01	0.1984	3.348
TCGA-85-7699-01	0.1984	2.542
TCGA-39-5034-11	0.1984
TCGA-55-A48Z-01	0.1983	3.347
TCGA-75-6212-01	0.1982	3.917
TCGA-85-8287-01	0.1982	2.306
TCGA-85-7950-01	0.1981	4.081
TCGA-44-2662-11	0.1981	2.295
TCGA-77-7335-01	0.1981	1.808
TCGA-18-3417-01	0.198	3.525
TCGA-92-8065-01	0.1979	1.384
TCGA-49-4512-01	0.1977	2.622
TCGA-90-6837-01	0.1977	1.528
TCGA-85-A510-01	0.1974	3.119
TCGA-77-8133-01	0.1974	2.701
TCGA-95-A4VN-01	0.1971	4.685
TCGA-44-2656-11	0.197
TCGA-44-A4SS-01	0.1968	3.205
TCGA-44-6145-01	0.1966	3.375
TCGA-75-7030-01	0.1966	3.042
TCGA-77-A5G1-01	0.1966	3.005
TCGA-50-6590-01	0.1966	2.402
TCGA-50-5068-01	0.1963	4.807
TCGA-64-1681-01	0.1962	3.702
TCGA-56-A5DR-01	0.1962	3.26
TCGA-93-A4JN-01	0.1962	3.046
TCGA-55-7724-01	0.1962	2.709
TCGA-75-6207-01	0.1962	2.638
TCGA-50-5072-01	0.1959	5.769
TCGA-69-8253-01	0.1959	3.566
TCGA-55-A4DG-01	0.1957	4.52
TCGA-44-6774-01	0.1957	2.248
TCGA-85-8582-01	0.1956	2.753
TCGA-56-8308-01	0.1956	2.435
TCGA-55-7995-01	0.1955	3.459
TCGA-22-5492-11	0.1955
TCGA-56-A4ZJ-01	0.1952	2.701
TCGA-69-7761-01	0.1951	3.586
TCGA-O2-A5IB-01	0.1951	3.201
TCGA-56-7580-01	0.1951	1.958
TCGA-77-7337-01	0.1949	3.278
TCGA-50-5932-11	0.1948	2.667
TCGA-60-2704-01	0.1948	2.346
TCGA-22-5472-11	0.1948	2.286
TCGA-49-6761-01	0.1947	4.734
TCGA-67-6217-01	0.1947	3.893
TCGA-05-4424-01	0.1946	3.39
TCGA-44-5645-11	0.1946	2.418
TCGA-55-6986-01	0.1944	2.803
TCGA-55-7816-01	0.1944	2.682
TCGA-18-5592-01	0.1943	2.809
TCGA-85-8664-01	0.1942	2.656
TCGA-49-6744-01	0.1941	3.204
TCGA-73-7499-01	0.194	5.55
TCGA-69-8254-01	0.194	4.838
TCGA-50-8457-01	0.1939	3.973
TCGA-49-AARO-01	0.1939	3.774
TCGA-78-7146-01	0.1937	3.475
TCGA-34-5236-01	0.1937	2.338
TCGA-78-7166-01	0.1936	3.8
TCGA-MP-A4TK-01	0.1936	3.027
TCGA-55-8302-01	0.1935	3.612
TCGA-62-A46V-01	0.1934	4.956
TCGA-93-A4JP-01	0.1934	3.151
TCGA-XC-AA0X-01	0.1934	2.653
TCGA-50-8459-01	0.1934	2.385
TCGA-33-4587-01	0.1933	3.925
TCGA-91-A4BD-01	0.1928	3.973
TCGA-97-8552-01	0.1927	3.314
TCGA-58-A46J-01	0.1923	3.975
TCGA-J2-A4AE-01	0.1922	3.722
TCGA-63-A5MN-01	0.1922	3.088
TCGA-86-7713-01	0.192	2.496
TCGA-43-5668-01	0.192	1.92
TCGA-95-8494-01	0.1919	4.209
TCGA-33-4566-11	0.1918
TCGA-44-2655-11	0.1917	2.608
TCGA-50-6673-01	0.1917	2.42
TCGA-50-5939-01	0.1916	3.985
TCGA-75-6203-01	0.1916	3.015
TCGA-98-A53C-01	0.1914	2.538
TCGA-78-7162-01	0.1912	4.246
TCGA-97-7547-01	0.1912	2.978
TCGA-05-5420-01	0.1909	3.943
TCGA-99-AA5R-01	0.1909	3.463
TCGA-58-8393-01	0.1909	3.096
TCGA-97-8175-01	0.1909	3.053
TCGA-85-7698-01	0.1908	3.61
TCGA-49-AARE-01	0.1907	3.847
TCGA-39-5022-01	0.1906	2.996
TCGA-MP-A4SY-01	0.1905	4.033
TCGA-97-A4M7-01	0.1905	3.087
TCGA-44-2668-11	0.1904	2.505
TCGA-50-5939-11	0.1904	2.419
TCGA-44-6147-01	0.1903	3.827
TCGA-91-6836-01	0.1903	2.941
TCGA-22-5492-01	0.1903	2.907
TCGA-MP-A4T2-01	0.1903
TCGA-55-7907-01	0.1902	4.045
TCGA-78-7149-01	0.1901	4.942
TCGA-63-A5MM-01	0.1901	2.735
TCGA-86-A4JF-01	0.19	5.367
TCGA-97-A4M5-01	0.19	2.863
TCGA-38-4631-11	0.19
TCGA-44-5643-11	0.1897
TCGA-58-8387-01	0.1896	3.625
TCGA-86-8668-01	0.1896	3.242
TCGA-96-7545-01	0.1896	2.892
TCGA-NJ-A55O-01	0.1895	2.941
TCGA-85-8354-01	0.1895	1.856
TCGA-85-A4JC-01	0.1894	4.218
TCGA-93-7348-01	0.1894	3.791
TCGA-62-8394-01	0.1894	3.703
TCGA-22-5478-01	0.1893	4
TCGA-90-A4EE-01	0.1892	3.679
TCGA-22-4613-01	0.1892	3.181
TCGA-44-8120-01	0.1891	3.555
TCGA-44-7662-01	0.189	3.665
TCGA-85-8276-01	0.189	1.601
TCGA-43-7658-01	0.1889	3.775
TCGA-92-7340-01	0.1888	3.515
TCGA-53-7624-01	0.1888	2.415
TCGA-22-5480-11	0.1888
TCGA-O1-A52J-01	0.1887	4.612
TCGA-73-4676-01	0.1887	3.896
TCGA-98-A53D-01	0.1887	2.571
TCGA-22-4605-01	0.1887	2.564
TCGA-21-A5DI-01	0.1887	2.457
TCGA-55-8616-01	0.1885	4.033
TCGA-55-8092-01	0.1885	3.789
TCGA-73-A9RS-01	0.1884	4.101
TCGA-39-5011-01	0.1884	3.452
TCGA-64-5775-01	0.1884	2.434
TCGA-43-6771-01	0.1884	1.821
TCGA-MP-A4TC-01	0.1883	3.383
TCGA-55-7903-01	0.1882	4.475
TCGA-55-8513-01	0.1882	3.006
TCGA-05-4427-01	0.1881	2.683
TCGA-NC-A5HI-01	0.188	3.348
TCGA-98-8023-01	0.1879	2.975
TCGA-L9-A8F4-01	0.1879	2.673
TCGA-86-7955-01	0.1878	3.493
TCGA-98-A539-01	0.1877	1.862
TCGA-05-4405-01	0.1875	4.092
TCGA-55-7910-01	0.1875	2.829
TCGA-55-8512-01	0.1874	3.554
TCGA-71-6725-01	0.1872	4.222
TCGA-MP-A4TE-01	0.1871	2.974
TCGA-39-5031-11	0.1871
TCGA-55-8206-01	0.1869	3.162
TCGA-55-A57B-01	0.1868	4.154
TCGA-55-A490-01	0.1868	3.532
TCGA-63-6202-01	0.1868	3.192
TCGA-22-5482-11	0.1868	2.167
TCGA-63-A5MV-01	0.1867	3.458
TCGA-33-4566-01	0.1867	2.706
TCGA-58-8386-01	0.1866	2.766
TCGA-50-5936-11	0.1866	2.599
TCGA-38-4631-01	0.1865	3.346
TCGA-22-5478-11	0.1862	2.316
TCGA-97-A4M1-01	0.1861	4.016
TCGA-39-5016-01	0.1861	3.532
TCGA-44-2665-11	0.1861	2.676
TCGA-91-6849-01	0.186	4.612
TCGA-05-4417-01	0.1858	2.756
TCGA-62-8398-01	0.1857	4.329
TCGA-53-7626-01	0.1857	2.98
TCGA-O2-A52N-01	0.1856	3.166
TCGA-L4-A4E5-01	0.1855	4.783
TCGA-86-7701-01	0.1855	4.177
TCGA-4B-A93V-01	0.1855	4.064
TCGA-55-6971-01	0.1855	2.53
TCGA-MP-A4T6-01	0.1854	4.426
TCGA-62-A472-01	0.1852	4.257
TCGA-85-8052-01	0.1851	3.321
TCGA-44-A47B-01	0.185	2.208
TCGA-69-7764-01	0.1849	4.117
TCGA-37-5819-01	0.1849	3.709
TCGA-NJ-A4YF-01	0.1847	3.707
TCGA-77-A5GH-01	0.1847	3.206
TCGA-22-5489-11	0.1847	2.616
TCGA-64-5779-01	0.1845	2.39
TCGA-43-6771-11	0.1845	2.102
TCGA-37-A5EN-01	0.1843	2.934
TCGA-39-5027-01	0.1842	3.834
TCGA-38-6178-01	0.1842	3.352
TCGA-68-8250-01	0.1841	2.591
TCGA-95-A4VP-01	0.184	3.323
TCGA-44-6146-01	0.184	2.77
TCGA-MP-A4TH-01	0.184	2.643
TCGA-56-8623-01	0.1839	2.942
TCGA-77-A5GF-01	0.1838	3.408
TCGA-58-A46K-01	0.1836	3.224
TCGA-97-A4M0-01	0.1835	3.887
TCGA-99-8033-01	0.1834	4.821
TCGA-97-A4M2-01	0.1834	3.635
TCGA-56-A49D-01	0.1834	2.849
TCGA-L9-A7SV-01	0.1833	4.324
TCGA-33-AASD-01	0.1833	4.254
TCGA-78-7160-01	0.1833	4.041
TCGA-78-7537-01	0.1833	3.734
TCGA-22-4599-11	0.1833
TCGA-33-4586-11	0.1833
TCGA-55-7283-01	0.1832	4.09
TCGA-39-5031-01	0.183	2.516
TCGA-NC-A5HN-01	0.1829	0.8861
TCGA-44-2665-01	0.1828	3.957
TCGA-95-7562-01	0.1827	3.277
TCGA-55-7725-01	0.1826	4.426
TCGA-05-5425-01	0.1826	3.134
TCGA-44-6778-01	0.1825	3.486
TCGA-77-6843-01	0.1822	2.803
TCGA-56-A5DS-01	0.1822	2.736
TCGA-55-7727-01	0.1821	4.751
TCGA-85-8049-01	0.1819	2.707
TCGA-33-AAS8-01	0.1818	2.988
TCGA-39-5035-01	0.1818	2.063
TCGA-05-5420-11	0.1818
TCGA-94-7033-01	0.1817	3.213
TCGA-49-4514-01	0.1816	3.826
TCGA-49-AARN-01	0.1816	3.743
TCGA-39-5024-01	0.1816	3.59
TCGA-50-5942-01	0.1815	2.896
TCGA-NJ-A4YG-01	0.1814	3.376
TCGA-39-5029-01	0.1814	3.124
TCGA-85-8277-01	0.1814	2.826
TCGA-39-5030-01	0.1814	2.307
TCGA-96-A4JK-01	0.1812	3.553
TCGA-63-A5MR-01	0.1811	3.626
TCGA-50-5935-01	0.181	4.233
TCGA-97-A4M6-01	0.1808	4.042
TCGA-86-8672-01	0.1808	3.517
TCGA-39-5035-11	0.1807
TCGA-43-3394-11	0.1805	3.368
TCGA-90-7767-01	0.1805	3.173
TCGA-S2-AA1A-01	0.1805	3.026
TCGA-55-6642-01	0.1805	2.263
TCGA-22-4601-11	0.1804
TCGA-34-5240-01	0.1803	3.917
TCGA-95-7947-01	0.1802	3.66
TCGA-L9-A743-01	0.1801	3.521
TCGA-86-8278-01	0.18	3.019
TCGA-55-8094-01	0.1798	4.968
TCGA-85-6560-01	0.1798	3.877
TCGA-55-8615-01	0.1798	3.179
TCGA-75-7025-01	0.1797	3.49
TCGA-95-7567-01	0.1796	4.203
TCGA-39-5016-11	0.1795
TCGA-MP-A4TD-01	0.1794	3.569
TCGA-99-8025-01	0.1792	3.744
TCGA-18-5595-11	0.1792
TCGA-52-7811-01	0.1791	2.387
TCGA-75-6211-01	0.1789	2.857
TCGA-77-A5G6-01	0.1789	2.667
TCGA-34-8454-01	0.1787	2.981
TCGA-85-7697-01	0.1787	2.248
TCGA-33-4583-11	0.1787
TCGA-49-AARQ-01	0.1784	3.827
TCGA-05-4433-01	0.1783	3.675
TCGA-LA-A7SW-01	0.1781	4.993
TCGA-21-5787-01	0.178	2.686
TCGA-77-7138-01	0.1779	3.435
TCGA-62-A46O-01	0.1778	4.214
TCGA-69-7765-01	0.1778	4.034
TCGA-77-8131-01	0.1772	2.53
TCGA-97-7546-01	0.1771	3.178
TCGA-99-8032-01	0.1769	3.256
TCGA-91-7771-01	0.1769	3.124
TCGA-91-8496-01	0.1768	4.239
TCGA-56-7823-01	0.1768	2.005
TCGA-77-8153-01	0.1766	3.673
TCGA-86-8075-01	0.1766	3.372
TCGA-50-6594-01	0.1765	4.542
TCGA-78-7535-01	0.1765	3.934
TCGA-86-8055-01	0.1765	3.752
TCGA-91-6840-01	0.1765	3.016
TCGA-44-2659-11	0.1765
TCGA-78-7539-01	0.1763	3.825
TCGA-55-A494-01	0.1763	2.983
TCGA-22-5485-11	0.1762
TCGA-85-6175-01	0.1761	1.589
TCGA-55-7726-01	0.176	3.043
TCGA-56-7731-01	0.176	2.918
TCGA-39-5037-01	0.176	2.723
TCGA-NC-A5HQ-01	0.176	2.294
TCGA-95-A4VK-01	0.1759	5.225
TCGA-85-A50Z-01	0.1759	3.24
TCGA-85-7844-01	0.1759	2.358
TCGA-78-7145-01	0.1758	4.148
TCGA-64-1679-01	0.1756	4.109
TCGA-85-8351-01	0.1756	3.423
TCGA-77-7140-01	0.1754	3.069
TCGA-44-A47F-01	0.1752
TCGA-80-5611-01	0.1751	4.428
TCGA-69-7760-01	0.1751	4.377
TCGA-78-7143-01	0.1751	4.054
TCGA-85-A4QQ-01	0.1751	2.531
TCGA-18-3417-11	0.175
TCGA-18-4721-11	0.175
TCGA-75-5147-01	0.1749	5.319
TCGA-43-8115-01	0.1749	2.655
TCGA-85-7696-01	0.1748	4.795
TCGA-90-7964-01	0.1747	3.25
TCGA-MP-A4T8-01	0.1745	3.308
TCGA-39-5011-11	0.1745
TCGA-78-7147-01	0.1744	4.888
TCGA-22-4613-11	0.1744
TCGA-85-7843-01	0.1743	2.383
TCGA-44-6148-01	0.1741	3.473
TCGA-22-5474-11	0.1741
TCGA-22-5491-11	0.1739	2.916
TCGA-85-8481-01	0.1737	2.785
TCGA-78-7163-01	0.1736	3.838
TCGA-55-7227-01	0.1734	3.328
TCGA-94-A5I6-01	0.1733	2.017
TCGA-97-8174-01	0.1732	3.767
TCGA-55-7570-01	0.1731	4.548
TCGA-50-5946-02	0.173	3.857
TCGA-86-6562-01	0.1728	4.678
TCGA-MN-A4N5-01	0.1728	3.964
TCGA-62-8395-01	0.1725	3.542
TCGA-52-7810-01	0.1725	3.153
TCGA-50-5946-01	0.1724	4.288
TCGA-56-7730-01	0.1724	3.444
TCGA-MN-A4N4-01	0.1722	2.605
TCGA-39-5037-11	0.1721
TCGA-55-8091-01	0.1719	3.381
TCGA-95-8039-01	0.1718	3.857
TCGA-56-8307-01	0.1717	1.938
TCGA-49-AAR0-01	0.1716	4.12
TCGA-J2-8192-01	0.1716	3.912
TCGA-22-5489-01	0.1716	2.717
TCGA-05-5423-01	0.1712	4.815
TCGA-44-A4SU-01	0.1712	3.783
TCGA-85-A511-01	0.1711	2.847
TCGA-77-7338-01	0.171	3.36
TCGA-97-7941-01	0.1709	3.692
TCGA-56-8503-01	0.1709	1.557
TCGA-33-4589-11	0.1708
TCGA-6A-AB49-01	0.1707	3.516
TCGA-85-A50M-01	0.1707	2.751
TCGA-O2-A52V-01	0.1706	2.224
TCGA-85-8350-01	0.1706	1.947
TCGA-39-5039-11	0.1705
TCGA-85-8048-01	0.1704	3.664
TCGA-86-8669-01	0.1704	3.138
TCGA-63-A5M9-01	0.1701	3.008
TCGA-34-5231-01	0.1701	2.093
TCGA-55-8508-01	0.17	2.913
TCGA-05-4415-01	0.1699	4.4
TCGA-92-8063-01	0.1699	3.564
TCGA-22-5474-01	0.1698	2.828
TCGA-69-7973-01	0.1697	3.025
TCGA-22-4601-01	0.1697	2.934
TCGA-94-A5I4-01	0.1696	2.383
TCGA-05-4384-01	0.1695	4.77
TCGA-97-A4M3-01	0.1695	2.942
TCGA-77-A5GB-01	0.1693	2.944
TCGA-86-8056-01	0.1693	2.825
TCGA-85-8479-01	0.1692	3.132
TCGA-86-8358-01	0.169	3.095
TCGA-22-5473-11	0.169
TCGA-22-5471-11	0.1688	2.461
TCGA-90-A4ED-01	0.1688	2.041
TCGA-43-6647-01	0.1688	2.04
TCGA-62-A470-01	0.1687	3.841
TCGA-85-A53L-01	0.1686	3.219
TCGA-NC-A5HR-01	0.1685	4.777
TCGA-39-5019-01	0.1685	2.446
TCGA-22-5471-01	0.1684	3.395
TCGA-49-AAR2-01	0.1682	4.375
TCGA-71-8520-01	0.1682	4.033
TCGA-NJ-A4YP-01	0.1682	4.004
TCGA-NC-A5HO-01	0.1682	3.641
TCGA-05-5428-01	0.1681	5.116
TCGA-96-7544-01	0.1681	2.401
TCGA-78-7154-01	0.1678	3.712
TCGA-55-8614-01	0.1678	2.299
TCGA-44-8117-01	0.1677	3.852
TCGA-33-6738-01	0.1677	3.367
TCGA-34-5234-01	0.1676	4.478
TCGA-85-A4CL-01	0.1676	3.523
TCGA-55-8507-01	0.1676	3.304
TCGA-22-5482-01	0.1676	3.163
TCGA-33-4586-01	0.1675	2.717
TCGA-97-8171-01	0.1673	5.281
TCGA-52-7812-01	0.1673	4.694
TCGA-46-6025-01	0.1672	3.31
TCGA-33-4582-01	0.1672	3.001
TCGA-96-8170-01	0.1672	2.864
TCGA-68-A59I-01	0.1672	2.502
TCGA-70-6722-01	0.1671	3.28
TCGA-63-A5ML-01	0.167	3.492
TCGA-21-5783-01	0.1669	3.069
TCGA-53-7813-01	0.1668	2.951
TCGA-55-8085-01	0.1667	4.865
TCGA-86-8359-01	0.1666	3.092
TCGA-78-7540-01	0.1666	2.984
TCGA-77-A5G8-01	0.1665	3.803
TCGA-94-7557-01	0.1663	4.469
TCGA-80-5608-01	0.166	3.474
TCGA-86-7714-01	0.166	3.082
TCGA-NK-A5CR-01	0.1658	3.542
TCGA-34-A5IX-01	0.1657	2.739
TCGA-44-6144-01	0.1655
TCGA-56-8624-01	0.1653	3.081
TCGA-62-8399-01	0.1652	2.496
TCGA-43-5668-11	0.1652
TCGA-56-7822-01	0.1651	3.173
TCGA-64-5815-01	0.1649	3.691
TCGA-39-5029-11	0.1649
TCGA-39-5030-11	0.1649
TCGA-22-5491-01	0.1647	2.977
TCGA-56-6546-01	0.1646	2.278
TCGA-33-4579-11	0.1646
TCGA-78-8655-01	0.1645	3.712
TCGA-60-2703-01	0.1645	3.129
TCGA-77-7142-01	0.1643	3.152
TCGA-O2-A52W-01	0.1641	2.88
TCGA-43-8116-01	0.1639	3.144
TCGA-56-8626-01	0.1639	2.994
TCGA-85-8070-01	0.1638	3.585
TCGA-85-A512-01	0.1638	3.525
TCGA-98-8020-01	0.1638	2.255
TCGA-39-5019-11	0.1636
TCGA-63-A5MT-01	0.1633	4.406
TCGA-94-7943-01	0.1633	3.055
TCGA-78-7220-01	0.1633	2.954
TCGA-78-7161-01	0.1632	3.494
TCGA-56-8305-01	0.1631	2.572
TCGA-68-7756-01	0.1629	2.964
TCGA-05-5715-01	0.1628	4.276
TCGA-98-A53B-01	0.1628	2.374
TCGA-39-5028-11	0.1626
TCGA-62-A46P-01	0.1624	3.216
TCGA-69-7763-01	0.1624	3.002
TCGA-22-5472-01	0.1624	2.702
TCGA-55-8097-01	0.1624	2.701
TCGA-22-5477-11	0.1623
TCGA-97-8176-01	0.1622	4.732
TCGA-86-8073-01	0.1621	3.702
TCGA-86-8054-01	0.162	2.877
TCGA-55-8090-01	0.1617	2.88
TCGA-L9-A5IP-01	0.1616	3.877
TCGA-NK-A5CX-01	0.1616	1.953
TCGA-39-5021-01	0.1615	4.367
TCGA-43-7657-01	0.1615	2.89
TCGA-50-5936-01	0.1614	3.78
TCGA-44-7671-01	0.1613	5.082
TCGA-50-7109-01	0.1613	3.08
TCGA-22-4609-01	0.1613	2.413
TCGA-55-8514-01	0.1611	5.269
TCGA-55-7914-01	0.1611	3.74
TCGA-58-8392-01	0.1611	3.453
TCGA-97-7937-01	0.161	3.297
TCGA-77-8154-01	0.1607	2.685
TCGA-77-A5G7-01	0.1607	2.531
TCGA-86-8674-01	0.1604	4.689
TCGA-33-AASI-01	0.1604	4.499
TCGA-58-8391-01	0.1603	2.624
TCGA-78-8662-01	0.1601	4.082
TCGA-77-7463-01	0.1601	0.3719
TCGA-97-8179-01	0.16	5.078
TCGA-86-8281-01	0.16	3.895
TCGA-34-5929-11	0.16
TCGA-50-6591-01	0.1599	3.102
TCGA-77-8139-01	0.1598	1.956
TCGA-MN-A4N1-01	0.1594	3.073
TCGA-69-7980-01	0.1593	2.886
TCGA-63-7022-01	0.1593	2.083
TCGA-77-8138-01	0.1592	3.333
TCGA-39-5021-11	0.1591
TCGA-49-6742-01	0.159	5.125
TCGA-97-7938-01	0.1589	3.4
TCGA-44-7660-01	0.1588	3.363
TCGA-18-5595-01	0.1586	3.276
TCGA-LA-A446-01	0.1583	2.899
TCGA-90-A59Q-01	0.1577	3.439
TCGA-34-8456-01	0.1576	3.293
TCGA-63-7021-01	0.1576	2.049
TCGA-56-8304-01	0.1575	2.537
TCGA-NK-A5CT-01	0.1573	2.309
TCGA-50-5944-01	0.1572	3.785
TCGA-MP-A4T7-01	0.1572	3.051
TCGA-77-8140-01	0.1572	2.261
TCGA-78-7159-01	0.157	2.361
TCGA-33-6737-01	0.1569	2.246
TCGA-35-5375-01	0.1568	2.947
TCGA-78-7158-01	0.1565	4.935
TCGA-J2-8194-01	0.1564	3.2
TCGA-05-4390-01	0.1563	1.753
TCGA-NK-A7XE-01	0.1561	2.872
TCGA-85-8288-01	0.1561	2.705
TCGA-95-7043-01	0.1559	4.173
TCGA-22-A5C4-01	0.1559	3.622
TCGA-63-A5MY-01	0.1558	2.108
TCGA-78-7150-01	0.1557	3.776
TCGA-52-7809-01	0.1555	3.332
TCGA-51-6867-01	0.1553	2.902
TCGA-55-8203-01	0.1548	2.591
TCGA-55-7284-01	0.1546	3.6
TCGA-39-5028-01	0.1544	3.136
TCGA-56-A4BW-01	0.1539	2.148
TCGA-94-8035-01	0.1538	2.604
TCGA-63-7020-01	0.1537	2.997
TCGA-77-8145-01	0.1536	1.065
TCGA-39-5039-01	0.1535	3.804
TCGA-55-8204-01	0.1535	2.728
TCGA-73-7498-01	0.1532	4.518
TCGA-NC-A5HD-01	0.1532	3.879
TCGA-55-8207-01	0.1527	4.459
TCGA-55-6543-01	0.1526	3.267
TCGA-56-5898-01	0.1516	2.65
TCGA-62-8397-01	0.1515	3.414
TCGA-56-7579-01	0.1509	2.359
TCGA-77-8008-01	0.1507	2.203
TCGA-39-5034-01	0.1506	2.009
TCGA-22-5477-01	0.1505	2.517
TCGA-44-6776-01	0.1499	3.946
TCGA-58-8388-01	0.1498	3.448
TCGA-NC-A5HG-01	0.1492	3.138
TCGA-33-AASB-01	0.1485	3.722
TCGA-22-5481-01	0.1484	2.536
TCGA-77-7139-01	0.1481	2.674
TCGA-22-5485-01	0.1477	2.942
TCGA-98-A538-01	0.1475	2.931
TCGA-43-A474-01	0.1466	2.063
TCGA-78-7153-01	0.1464	3.918
TCGA-37-A5EM-01	0.1464	2.683
TCGA-85-7710-01	0.146	2.278
TCGA-NC-A5HM-01	0.1459	3.896
TCGA-77-8148-01	0.1456	3.435
TCGA-NJ-A4YI-01	0.1455	4.193
TCGA-NC-A5HP-01	0.1455	3.221
TCGA-43-A56V-01	0.1452	3.864
TCGA-44-5644-01	0.1451	2.224
TCGA-33-A5GW-01	0.1444	2.978
TCGA-43-7656-01	0.1444	2.784
TCGA-67-6215-01	0.1443	4.397
TCGA-77-8128-01	0.1441	3.231
TCGA-77-6842-01	0.1441	1.103
TCGA-56-A62T-01	0.144	3.258
TCGA-77-8146-01	0.144	2.812
TCGA-67-4679-01	0.1439	4.001
TCGA-L9-A50W-01	0.1439	3.797
TCGA-34-8455-01	0.1439	3.476
TCGA-98-8022-01	0.1437	3.086
TCGA-63-7023-01	0.143	3.816
TCGA-L3-A4E7-01	0.1429	2.664
TCGA-86-8074-01	0.1426	3.662
TCGA-96-8169-01	0.1425	3.297
TCGA-56-7221-01	0.1423	3.194
TCGA-56-7223-01	0.1418	3.609
TCGA-77-6845-01	0.1415	2.912
TCGA-22-4593-01	0.1406	1.873
TCGA-34-5928-01	0.1403	4.242
TCGA-98-8021-01	0.14	2.489
TCGA-77-8143-01	0.1396	4.335
TCGA-05-5429-01	0.1389	4.182
TCGA-44-8119-01	0.1389	1.986
TCGA-64-5774-01	0.1381	2.337
TCGA-56-7222-01	0.1375	2.894
TCGA-85-8352-01	0.1374	3.678
TCGA-90-7766-01	0.1368	2.526
TCGA-78-7633-01	0.1355	5.277
TCGA-56-5897-01	0.1353	2.625
TCGA-85-A4QR-01	0.1338	2.913
TCGA-77-6844-01	0.1331	3.615
TCGA-NC-A5HT-01	0.1297	2.875
TCGA-56-A4BX-01	0.129	2.728
TCGA-78-7156-01	0.1277	5.736
TCGA-50-5932-01	0.1276	4.473
TCGA-NC-A5HF-01	0.127	2.255
TCGA-94-A4VJ-01	0.1253	2.796
TCGA-77-8130-01	0.1249	1.368
TCGA-MP-A5C7-01	0.1247	5.543
TCGA-77-7465-01	0.1239	3.78
TCGA-63-5131-01	0.1236	2.454
TCGA-NK-A5D1-01	0.1234	4.308
TCGA-75-6206-01	0.1228	3.41
TCGA-NJ-A7XG-01	0.1181	4.236
TCGA-55-6972-01	0.1156	6.019
TCGA-56-8622-01	0.1144	2.985
TCGA-34-5927-01	0.1129	2.437
TCGA-63-A5MH-01	0.1121	3.727
TCGA-33-4579-01	0.1092	3.775
TCGA-NC-A5HH-01	0.1079	4.811
TCGA-46-6026-01	0.09986	1.086
TCGA-34-5929-01	0.09902	2.02
TCGA-43-6143-01	0.09882	2.318
TCGA-56-8083-01	0.07249	2.791
TCGA-44-2655-01		6.071
TCGA-49-4486-01		5.831
TCGA-49-4494-01		5.81
TCGA-37-4141-01		5.761
TCGA-05-4395-01		5.676
TCGA-67-3770-01		5.111
TCGA-64-1676-01		5.055
TCGA-73-4677-01		4.981
TCGA-38-4625-01		4.918
TCGA-35-3615-01		4.798
TCGA-55-1596-01		4.743
TCGA-37-4133-01		4.715
TCGA-22-0944-01		4.688
TCGA-73-4670-01		4.674
TCGA-67-3772-01		4.619
TCGA-73-4666-01		4.583
TCGA-46-3769-01		4.579
TCGA-49-4506-01		4.543
TCGA-05-4244-01		4.537
TCGA-37-4132-01		4.518
TCGA-49-4501-01		4.443
TCGA-37-4129-01		4.36
TCGA-22-4591-01		4.34
TCGA-66-2753-01		4.297
TCGA-05-4397-01		4.278
TCGA-05-4402-01		4.219
TCGA-18-3421-01		4.185
TCGA-38-4630-01		4.159
TCGA-05-4389-01		4.113
TCGA-49-4505-01		4.086
TCGA-21-1079-01		4.064
TCGA-64-1680-01		4.057
TCGA-37-3783-01		4.044
TCGA-64-1677-01		4.041
TCGA-43-2578-01		3.977
TCGA-37-4135-01		3.962
TCGA-18-3412-01		3.945
TCGA-22-4596-01		3.915
TCGA-05-4418-01		3.898
TCGA-35-4123-01		3.886
TCGA-22-4594-01		3.878
TCGA-66-2756-01		3.878
TCGA-60-2696-01		3.863
TCGA-55-1595-01		3.853
TCGA-05-4422-01		3.852
TCGA-38-4629-01		3.825
TCGA-18-3411-01		3.812
TCGA-05-4420-01		3.811
TCGA-05-4398-01		3.808
TCGA-67-3773-01		3.805
TCGA-77-8007-11		3.774
TCGA-22-1017-01		3.754
TCGA-66-2782-01		3.716
TCGA-55-1592-01		3.685
TCGA-60-2714-01		3.676
TCGA-05-4434-01		3.656
TCGA-05-4426-01		3.653
TCGA-60-2723-01		3.633
TCGA-18-3406-01		3.592
TCGA-44-3398-01		3.586
TCGA-60-2695-01		3.582
TCGA-73-4675-01		3.54
TCGA-44-2662-01		3.537
TCGA-05-4250-01		3.535
TCGA-18-3408-01		3.53
TCGA-73-4662-01		3.512
TCGA-22-4607-01		3.509
TCGA-44-2659-01		3.501
TCGA-60-2707-01		3.5
TCGA-49-4512-11		3.499
TCGA-49-6761-11		3.499
TCGA-51-4080-01		3.485
TCGA-66-2763-01		3.472
TCGA-33-4533-01		3.458
TCGA-38-4628-01		3.453
TCGA-22-0940-01		3.44
TCGA-21-1081-01		3.414
TCGA-66-2769-01		3.41
TCGA-66-2789-01		3.394
TCGA-21-1080-01		3.388
TCGA-55-6985-11		3.381
TCGA-60-2706-01		3.38
TCGA-37-3792-01		3.375
TCGA-60-2709-11		3.354
TCGA-05-4382-01		3.346
TCGA-38-4626-11		3.312
TCGA-66-2783-01		3.311
TCGA-22-1012-01		3.309
TCGA-18-3414-01		3.302
TCGA-58-8386-11		3.299
TCGA-51-4081-01		3.293
TCGA-05-4403-01		3.292
TCGA-43-3394-01		3.288
TCGA-91-6829-11		3.283
TCGA-38-4626-01		3.28
TCGA-43-2581-01		3.262
TCGA-49-6742-11		3.26
TCGA-66-2766-01		3.256
TCGA-66-2800-01		3.241
TCGA-66-2781-01		3.237
TCGA-21-1078-01		3.224
TCGA-66-2773-01		3.214
TCGA-44-3919-01		3.21
TCGA-38-4625-11		3.208
TCGA-21-1072-01		3.202
TCGA-33-4587-11		3.2
TCGA-21-1070-01		3.199
TCGA-49-4490-11		3.199
TCGA-39-5040-11		3.197
TCGA-66-2770-01		3.186
TCGA-34-2596-01		3.16
TCGA-55-6983-11		3.158
TCGA-67-3774-01		3.151
TCGA-34-2608-01		3.138
TCGA-21-1082-01		3.102
TCGA-22-1016-01		3.097
TCGA-43-7658-11		3.084
TCGA-56-8309-11		3.084
TCGA-60-2726-01		3.079
TCGA-05-4249-01		3.076
TCGA-66-2737-01		3.071
TCGA-56-7222-11		3.063
TCGA-66-2727-01		3.062
TCGA-55-6968-11		3.057
TCGA-73-4659-01		3.049
TCGA-22-1002-01		3.047
TCGA-43-5670-11		3.045
TCGA-64-1678-01		3.045
TCGA-18-3416-01		3.036
TCGA-21-1077-01		3.033
TCGA-73-4668-01		3.022
TCGA-60-2724-01		3.006
TCGA-60-2698-01		2.997
TCGA-55-6969-11		2.992
TCGA-33-4547-01		2.986
TCGA-38-4627-11		2.986
TCGA-60-2716-01		2.982
TCGA-66-2790-01		2.98
TCGA-66-2771-01		2.974
TCGA-55-6986-11		2.969
TCGA-66-2787-01		2.958
TCGA-56-7579-11		2.95
TCGA-22-1000-01		2.942
TCGA-18-3419-01		2.934
TCGA-49-4507-01		2.927
TCGA-91-6849-11		2.919
TCGA-55-6971-11		2.917
TCGA-91-6836-11		2.909
TCGA-44-6776-11		2.907
TCGA-77-7335-11		2.903
TCGA-66-2785-01		2.902
TCGA-43-3920-01		2.901
TCGA-55-6978-11		2.901
TCGA-91-6847-11		2.9
TCGA-66-2759-01		2.895
TCGA-21-1076-01		2.881
TCGA-66-2754-01		2.879
TCGA-90-7767-11		2.878
TCGA-91-6835-11		2.864
TCGA-49-6743-11		2.852
TCGA-66-2778-01		2.848
TCGA-49-4510-01		2.843
TCGA-22-5483-11		2.841
TCGA-66-2758-01		2.831
TCGA-55-6979-11		2.829
TCGA-33-4532-01		2.828
TCGA-51-4080-11		2.827
TCGA-21-1071-01		2.824
TCGA-55-6975-11		2.822
TCGA-66-2786-01		2.814
TCGA-22-5481-11		2.806
TCGA-91-6828-11		2.804
TCGA-44-2657-11		2.802
TCGA-56-7823-11		2.794
TCGA-66-2768-01		2.787
TCGA-66-2791-01		2.771
TCGA-44-2661-01		2.77
TCGA-56-7580-11		2.767
TCGA-66-2767-01		2.766
TCGA-60-2715-01		2.76
TCGA-56-8201-11		2.754
TCGA-66-2794-01		2.748
TCGA-55-6981-11		2.737
TCGA-21-1083-01		2.723
TCGA-05-4430-01		2.721
TCGA-35-4122-01		2.72
TCGA-22-4609-11		2.716
TCGA-43-2576-01		2.716
TCGA-55-6972-11		2.711
TCGA-66-2777-01		2.711
TCGA-66-2734-01		2.705
TCGA-56-8623-11		2.699
TCGA-44-3396-01		2.695
TCGA-66-2742-01		2.685
TCGA-77-7338-11		2.685
TCGA-60-2721-01		2.683
TCGA-91-6831-11		2.679
TCGA-37-3789-01		2.665
TCGA-66-2792-01		2.656
TCGA-43-7657-11		2.655
TCGA-92-7340-11		2.63
TCGA-66-2755-01		2.628
TCGA-22-1005-01		2.627
TCGA-46-3766-01		2.619
TCGA-55-6980-11		2.619
TCGA-60-2725-01		2.619
TCGA-66-2793-01		2.61
TCGA-55-6984-11		2.598
TCGA-56-7730-11		2.592
TCGA-77-7337-11		2.587
TCGA-85-7710-11		2.586
TCGA-22-4593-11		2.582
TCGA-18-3410-01		2.581
TCGA-55-6970-11		2.58
TCGA-46-3767-01		2.578
TCGA-38-4627-01		2.575
TCGA-18-4086-01		2.574
TCGA-33-6737-11		2.574
TCGA-60-2713-01		2.573
TCGA-60-2720-01		2.571
TCGA-66-2757-01		2.563
TCGA-56-8083-11		2.545
TCGA-55-1594-01		2.54
TCGA-56-1622-01		2.532
TCGA-51-4081-11		2.504
TCGA-44-3398-11		2.503
TCGA-66-2744-01		2.501
TCGA-67-3771-01		2.501
TCGA-44-6777-11		2.481
TCGA-18-3415-01		2.47
TCGA-44-3396-11		2.467
TCGA-60-2710-01		2.448
TCGA-22-4595-01		2.441
TCGA-60-2719-01		2.438
TCGA-66-2795-01		2.435
TCGA-22-1011-01		2.43
TCGA-66-2788-01		2.427
TCGA-46-3765-01		2.414
TCGA-05-4432-01		2.413
TCGA-44-2657-01		2.396
TCGA-51-4079-01		2.393
TCGA-34-8454-11		2.392
TCGA-56-7582-11		2.384
TCGA-56-7731-11		2.383
TCGA-50-6595-11		2.371
TCGA-55-6982-11		2.344
TCGA-44-2661-11		2.33
TCGA-43-6647-11		2.317
TCGA-33-4538-01		2.302
TCGA-37-4130-01		2.216
TCGA-43-6773-11		2.213
TCGA-18-3407-01		2.195
TCGA-66-2765-01		2.192
TCGA-51-4079-11		2.188
TCGA-66-2780-01		2.153
TCGA-43-6143-11		2.143
TCGA-34-7107-11		2.113
TCGA-49-6744-11		2.098
TCGA-18-3409-01		2.079
TCGA-77-7138-11		2.062
TCGA-21-1075-01		1.969
TCGA-34-2600-01		1.965
TCGA-77-8008-11		1.918
TCGA-60-2711-01		1.913
TCGA-90-6837-11		1.899
TCGA-77-7142-11		1.875
TCGA-60-2708-01		1.805
TCGA-60-2722-01		1.7
TCGA-56-8082-11		1.684
TCGA-18-4083-01		1.68
TCGA-60-2712-01		1.639
TCGA-22-4604-01		1.571
TCGA-46-3768-01		1.318
TCGA-17-Z000-01
TCGA-17-Z001-01
TCGA-17-Z002-01
TCGA-17-Z003-01
TCGA-17-Z004-01
TCGA-17-Z005-01
TCGA-17-Z006-01
TCGA-17-Z007-01
TCGA-17-Z008-01
TCGA-17-Z009-01
TCGA-17-Z010-01
TCGA-17-Z011-01
TCGA-17-Z012-01
TCGA-17-Z013-01
TCGA-17-Z014-01
TCGA-17-Z015-01
TCGA-17-Z016-01
TCGA-17-Z017-01
TCGA-17-Z018-01
TCGA-17-Z019-01
TCGA-17-Z020-01
TCGA-17-Z021-01
TCGA-17-Z022-01
TCGA-17-Z023-01
TCGA-17-Z024-01
TCGA-17-Z025-01
TCGA-17-Z026-01
TCGA-17-Z027-01
TCGA-17-Z028-01
TCGA-17-Z029-01
TCGA-17-Z030-01
TCGA-17-Z031-01
TCGA-17-Z032-01
TCGA-17-Z033-01
TCGA-17-Z034-01
TCGA-17-Z035-01
TCGA-17-Z036-01
TCGA-17-Z037-01
TCGA-17-Z038-01
TCGA-17-Z039-01
TCGA-17-Z040-01
TCGA-17-Z041-01
TCGA-17-Z042-01
TCGA-17-Z043-01
TCGA-17-Z044-01
TCGA-17-Z045-01
TCGA-17-Z046-01
TCGA-17-Z047-01
TCGA-17-Z048-01
TCGA-17-Z049-01
TCGA-17-Z050-01
TCGA-17-Z051-01
TCGA-17-Z052-01
TCGA-17-Z053-01
TCGA-17-Z054-01
TCGA-17-Z055-01
TCGA-17-Z056-01
TCGA-17-Z057-01
TCGA-17-Z058-01
TCGA-17-Z059-01
TCGA-17-Z060-01
TCGA-17-Z061-01
TCGA-17-Z062-01
TCGA-18-3406-11
TCGA-18-3407-11
TCGA-18-3408-11
TCGA-18-3409-11
TCGA-18-3410-11
TCGA-18-3411-11
TCGA-18-3412-11
TCGA-18-3414-11
TCGA-18-3415-11
TCGA-18-3416-11
TCGA-18-3419-11
TCGA-18-3421-11
TCGA-34-2604-01
TCGA-34-2605-01
TCGA-34-2609-01
TCGA-35-3621-01
TCGA-38-4628-11
TCGA-38-4629-11
TCGA-38-4630-11
TCGA-44-2664-01
TCGA-44-3918-11
TCGA-44-3919-11
TCGA-44-4112-11
TCGA-44-7659-11
TCGA-44-7660-11
TCGA-44-7661-11
TCGA-44-7662-11
TCGA-44-7667-11
TCGA-44-7669-11
TCGA-44-7670-11
TCGA-44-7671-11
TCGA-44-7672-11
TCGA-49-4486-11
TCGA-49-4494-11
TCGA-49-4501-11
TCGA-49-4505-11
TCGA-49-4506-11
TCGA-49-4507-11
TCGA-49-4510-11
TCGA-50-7109-11
TCGA-55-1592-11
TCGA-55-1594-11
TCGA-55-1595-11
TCGA-55-1596-11
TCGA-55-7283-11
TCGA-55-7570-11
TCGA-55-7574-11
TCGA-55-7576-11
TCGA-55-7724-11
TCGA-55-7725-11
TCGA-55-7726-11
TCGA-55-7903-11
TCGA-55-7910-11
TCGA-55-7911-11
TCGA-55-7914-11
TCGA-66-2727-11
TCGA-66-2734-11
TCGA-66-2737-11
TCGA-66-2742-11
TCGA-66-2744-11
TCGA-66-2753-11
TCGA-66-2754-11
TCGA-66-2771-11
TCGA-66-2787-11
TCGA-66-2788-11
TCGA-66-2789-11
TCGA-66-2790-11
TCGA-66-2791-11
TCGA-66-2792-11
TCGA-66-2795-11
TCGA-73-4659-11
TCGA-73-4662-11
TCGA-73-4666-11
TCGA-73-4668-11
TCGA-73-4670-11
TCGA-73-4675-11
TCGA-73-4677-11
TCGA-78-7163-11
TCGA-78-7540-11
TCGA-86-7711-11
TCGA-86-7713-11
TCGA-93-7348-11

## Sheet: Figure 3C
LINC00467 expression	LINC00467 methylation
0.6431	0.1729
0.648	0.1509
0.7627	0.2128
0.8464	0.1672
0.8928	0.1012
0.9214	0.2455
0.9291	0.1931
0.9337	0.2052
0.9364	0.1831
0.9497	0.1525
0.9498	0.1144
0.9945	0.1757
0.9993	0.1854
1.026	0.1647
1.03	0.1653
1.042	0.1821
1.043	0.1437
1.051	0.1712
1.053	0.152
1.053	0.186
1.056	0.149
1.061	0.1741
1.103	0.1506
1.116	0.1632
1.117	0.2028
1.12	0.1941
1.124	0.1991
1.125	0.1938
1.137	0.1821
1.14	0.1653
1.145	0.1712
1.15	0.2261
1.152	0.168
1.167	0.1949
1.168	0.19
1.174	0.1959
1.178	0.1792
1.182	0.1706
1.194	0.1567
1.198	0.1936
1.199	0.3636
1.207	0.1554
1.21	0.186
1.211	0.2034
1.213	0.1891
1.218	0.2006
1.222	0.1638
1.239	0.203
1.241	0.1618
1.246	0.1748
1.251	0.1246
1.257	0.1229
1.263	0.1584
1.283	0.1574
1.289	0.136
1.298	0.1882
1.315	0.1919
1.318	0.1662
1.321	0.1459
1.327	0.1776
1.329	0.2063
1.332	0.1782
1.333	0.1835
1.339	0.1856
1.35	0.1465
1.357	0.1895
1.364	0.1794
1.369	0.1476
1.369	0.1996
1.373	0.1769
1.384	0.1443
1.385	0.1978
1.388	0.1699
1.394	0.1608
1.396	0.1688
1.397	0.1345
1.398	0.1545
1.403	0.1218
1.403	0.1521
1.405	0.1684
1.412	0.1668
1.413	0.1501
1.414	0.1522
1.414	0.1593
1.415	0.1471
1.419	0.1826
1.426	0.1369
1.429	0.1673
1.43	0.1796
1.431	0.1722
1.437	0.1549
1.437	0.1872
1.452	0.1861
1.455	0.1562
1.461	0.2331
1.462	0.1729
1.466	0.1847
1.467	0.1528
1.472	0.2087
1.473	0.1841
1.474	0.1937
1.479	0.2053
1.487	0.1513
1.488	0.16
1.49	0.1492
1.508	0.1406
1.514	0.1378
1.516	0.1456
1.518	0.1842
1.518	0.2321
1.519	0.1637
1.522	0.2019
1.525	0.1655
1.526	0.2012
1.527	0.1783
1.529	0.1772
1.53	0.1521
1.536	0.1478
1.558	0.1746
1.562	0.1733
1.565	0.2049
1.569	0.1705
1.569	0.1837
1.577	0.1679
1.58	0.1905
1.582	0.1429
1.583	0.1568
1.584	0.1729
1.588	0.168
1.59	0.1338
1.59	0.16
1.592	0.1464
1.595	0.1629
1.612	0.1398
1.613	0.1534
1.613	0.1583
1.613	0.2092
1.617	0.1907
1.627	0.1576
1.629	0.198
1.631	0.1846
1.633	0.1344
1.633	0.1567
1.633	0.1727
1.634	0.1838
1.649	0.2023
1.65	0.1404
1.656	0.166
1.66	0.194
1.664	0.1701
1.665	0.1762
1.667	0.2014
1.667	0.2019
1.669	0.2131
1.687	0.1529
1.687	0.177
1.688	0.1449
1.689	0.156
1.691	0.2092
1.702	0.1543
1.703	0.1409
1.705	0.157
1.708	0.2078
1.711	0.1478
1.711	0.1779
1.713	0.1144
1.716	0.1727
1.719	0.1483
1.719	0.1712
1.72	0.1964
1.722	0.1395
1.727	0.1427
1.728	0.1343
1.731	0.1861
1.733	0.2063
1.741	0.1933
1.741	0.1945
1.749	0.1486
1.749	0.1604
1.752	0.1738
1.759	0.1643
1.761	0.1805
1.77	0.1461
1.77	0.1736
1.771	0.226
1.776	0.1699
1.778	0.1811
1.78	0.1642
1.784	0.1726
1.785	0.1815
1.79	0.2013
1.793	0.1453
1.795	0.1556
1.795	0.1627
1.795	0.1844
1.812	0.1901
1.816	0.1675
1.823	0.1926
1.824	0.1845
1.829	0.1336
1.83	0.171
1.832	0.1733
1.837	0.187
1.84	0.1579
1.843	0.1771
1.848	0.1809
1.848	0.1951
1.852	0.1789
1.856	0.1499
1.862	0.1965
1.863	0.1395
1.866	0.1842
1.868	0.1887
1.874	0.2038
1.875	0.2036
1.877	0.1777
1.883	0.1946
1.884	0.1575
1.884	0.1591
1.887	0.1574
1.887	0.184
1.888	0.1608
1.89	0.1484
1.903	0.183
1.904	0.1267
1.904	0.1593
1.916	0.1546
1.917	0.1608
1.92	0.1666
1.924	0.1435
1.927	0.1964
1.934	0.1988
1.943	0.2067
1.944	0.1893
1.946	0.1909
1.946	0.2094
1.947	0.1922
1.954	0.2168
1.955	0.1607
1.955	0.1876
1.956	0.1664
1.956	0.1876
1.958	0.1592
1.963	0.1647
1.964	0.1808
1.966	0.1435
1.966	0.1685
1.97	0.1712
1.972	0.165
1.974	0.1555
1.974	0.1682
1.977	0.1615
1.977	0.2032
1.98	0.1877
1.984	0.1273
1.985	0.1916
2	0.1754
2.001	0.1534
2.001	0.1742
2.003	0.1835
2.004	0.1972
2.009	0.1336
2.017	0.209
2.019	0.1548
2.02	0.1711
2.022	0.1331
2.023	0.1328
2.03	0.1523
2.03	0.2056
2.033	0.1736
2.034	0.1332
2.034	0.1385
2.037	0.1777
2.045	0.1779
2.049	0.1927
2.053	0.209
2.057	0.1771
2.058	0.1561
2.059	0.201
2.063	0.1781
2.069	0.1526
2.079	0.1398
2.079	0.1732
2.081	0.1431
2.081	0.1757
2.086	0.1474
2.09	0.2049
2.092	0.1789
2.093	0.1749
2.096	0.1773
2.097	0.1887
2.1	0.1517
2.102	0.2078
2.105	0.168
2.106	0.1857
2.109	0.1642
2.11	0.1406
2.11	0.1531
2.119	0.1312
2.123	0.1348
2.123	0.1677
2.13	0.1582
2.131	0.1337
2.137	0.1743
2.139	0.1797
2.142	0.1579
2.147	0.1876
2.157	0.1367
2.157	0.1439
2.157	0.1526
2.157	0.1785
2.158	0.2177
2.16	0.1398
2.16	0.1538
2.162	0.1454
2.167	0.1814
2.172	0.1726
2.173	0.1579
2.173	0.2031
2.179	0.191
2.184	0.1828
2.186	0.1367
2.187	0.166
2.187	0.173
2.203	0.173
2.205	0.1321
2.21	0.1645
2.212	0.155
2.213	0.2225
2.22	0.1437
2.22	0.1655
2.227	0.1643
2.231	0.1574
2.239	0.1551
2.245	0.1602
2.246	0.1946
2.248	0.1325
2.248	0.1515
2.253	0.1533
2.256	0.1941
2.259	0.1574
2.262	0.1562
2.263	0.1642
2.263	0.1761
2.265	0.1877
2.267	0.1999
2.27	0.1453
2.271	0.176
2.271	0.192
2.272	0.1708
2.273	0.1772
2.278	0.19
2.281	0.1272
2.285	0.1882
2.3	0.1387
2.301	0.1362
2.301	0.1484
2.306	0.147
2.306	0.1616
2.306	0.1799
2.309	0.2002
2.312	0.1783
2.321	0.1873
2.323	0.1434
2.323	0.1526
2.33	0.1807
2.331	0.159
2.333	0.136
2.333	0.1453
2.336	0.1236
2.341	0.2047
2.35	0.1805
2.358	0.1432
2.367	0.1693
2.379	0.1393
2.384	0.1546
2.384	0.1616
2.387	0.1583
2.39	0.1419
2.392	0.1548
2.396	0.1686
2.4	0.1768
2.401	0.1409
2.403	0.1802
2.404	0.1662
2.408	0.1474
2.413	0.1758
2.415	0.1942
2.418	0.111
2.428	0.2043
2.433	0.1952
2.436	0.1931
2.443	0.1781
2.445	0.1499
2.449	0.1986
2.45	0.1556
2.458	0.1471
2.458	0.1679
2.46	0.1584
2.474	0.1685
2.475	0.1451
2.475	0.1648
2.479	0.1202
2.494	0.1419
2.496	0.1744
2.505	0.1654
2.507	0.1937
2.517	0.1589
2.529	0.1759
2.541	0.1344
2.541	0.1924
2.551	0.1701
2.556	0.2019
2.556	0.2032
2.557	0.1437
2.571	0.2011
2.576	0.214
2.585	0.2101
2.597	0.2208
2.604	0.1532
2.611	0.1976
2.612	0.1788
2.613	0.1437
2.613	0.1927
2.62	0.1331
2.627	0.1671
2.633	0.1596
2.644	0.2077
2.671	0.151
2.673	0.1994
2.68	0.1583
2.685	0.207
2.706	0.1577
2.714	0.1862
2.72	0.1913
2.721	0.2047
2.722	0.1497
2.725	0.1542
2.735	0.1653
2.758	0.1403
2.765	0.1516
2.766	0.1896
2.777	0.1525
2.78	0.2095
2.784	0.1766
2.788	0.2053
2.789	0.1541
2.793	0.182
2.8	0.1584
2.808	0.1652
2.836	0.1767
2.858	0.1411
2.888	0.1562
2.907	0.168
2.914	0.1409
2.946	0.1766
2.948	0.173
2.952	0.1637
2.957	0.1818
2.96	0.2073
2.968	0.1805
2.969	0.1255
2.976	0.1417
3.032	0.1416
3.04	0.1819
3.049	0.1756
3.058	0.1466
3.058	0.1816
3.084	0.2262
3.096	0.1261
3.096	0.1352
3.109	0.1406
3.117	0.1703
3.121	0.1403
3.134	0.164
3.172	0.1769
3.175	0.1526
3.281	0.1388
3.316	0.1484
3.345	0.1563
3.49	0.1676
3.504	0.1752
3.619	0.1189
3.699	0.1191
3.791	0.1073
4.053	0.209

## Sheet: Figure 3D
0μm	5μm	10μm	20μm
1.121	1.7049	3.9775	3.9121
1.157	1.7528	3.8336	3.8193
1.1069	1.7349	3.9154	3.905
