# Supplementary material for: LINC00467 Is Upregulated by DNA Copy Number Amplification and Hypomethylation and Shows ceRNA Potential in Lung Adenocarcinoma
Source: Front Endocrinol (Lausanne). 2022 Jan 13;12:802463. doi: 10.3389/fendo.2021.802463 (PMC8792904; doi:10.3389/fendo.2021.802463)
Supplement: Supplementary file 7 [file Table_7.xlsx]

## Sheet: TCGA LUAD upregulated genes
Gene Symbol	Gene ID	Median (Tumor)	Median (Normal)	Log2(Fold Change)	adjp
RP11-40C6.2	ENSG00000219928.2	876.068	1.95	8.216	1.5e-160
XAGE1A	ENSG00000204379.10	168.545	0.34	6.983	7.11e-76
XAGE1B	ENSG00000204382.11	118.02	0.64	6.181	1.82e-74
RP5-940J5.9	ENSG00000269968.1	41.981	0	5.426	3.12e-54
IGHGP	ENSG00000253755.1	70.112	1.41	4.883	2.29e-118
CRABP2	ENSG00000143320.8	136.503	4.07	4.761	7.75e-110
FAM83A	ENSG00000147689.16	30.26	0.19	4.715	5.9e-178
SPP1	ENSG00000118785.13	252.422	9.08	4.652	9.22e-123
TMPRSS4	ENSG00000137648.16	47.221	1.05	4.556	1.49e-131
CEACAM5	ENSG00000105388.14	83.47	2.68	4.521	3.47e-72
IGKV2D-28	ENSG00000242534.2	60.212	1.9	4.4	1.43e-83
COL10A1	ENSG00000123500.9	23.591	0.36	4.176	1.68e-137
TUBB3	ENSG00000258947.6	51.47	2.13	4.067	4.75e-149
CST1	ENSG00000170373.8	15.53	0	4.047	7.24e-91
SPINK1	ENSG00000164266.10	53.958	2.37	4.028	4.79e-61
MTND4P12	ENSG00000247627.2	19.55	0.34	3.939	5.55e-36
B3GNT3	ENSG00000179913.10	19.2	0.34	3.914	8.74e-170
CXCL13	ENSG00000156234.7	20.5	0.43	3.91	1.17e-94
MMP11	ENSG00000099953.9	25.329	0.85	3.831	1.09e-135
MUC5B	ENSG00000117983.17	26.08	0.96	3.788	1.66e-34
IGHG4	ENSG00000211892.3	241.888	17.46	3.718	2.55e-70
CP	ENSG00000047457.13	123.81	8.57	3.705	4.51e-90
AGR2	ENSG00000106541.11	389.532	31.939	3.568	1.41e-86
AP003391.1	ENSG00000281272.1	10.49	0	3.522	5.16e-17
UBE2C	ENSG00000175063.16	46.629	3.39	3.44	2.53e-133
PPAP2C	ENSG00000141934.9	85.182	7.05	3.42	3.49e-159
CYP24A1	ENSG00000019186.9	10.81	0.15	3.36	1.89e-71
SPDEF	ENSG00000124664.10	18.96	0.95	3.356	3.5e-108
CTHRC1	ENSG00000164932.12	58.679	4.98	3.319	8.16e-114
AFAP1-AS1	ENSG00000272620.1	9.71	0.09	3.297	2.99e-86
HMGB3	ENSG00000029993.14	150.612	15.03	3.242	2.72e-164
PYCR1	ENSG00000183010.16	88.382	8.54	3.228	8.65e-179
UBD	ENSG00000213886.3	48.999	4.41	3.208	4.17e-67
MDK	ENSG00000110492.15	439.981	46.84	3.204	1.69e-142
C15orf48	ENSG00000166920.10	58.181	5.5	3.187	1.47e-85
CDH3	ENSG00000062038.13	39.711	3.54	3.165	7.56e-91
MYBL2	ENSG00000101057.15	17.349	1.05	3.162	4.73e-125
CKS1BP3	ENSG00000268942.2	7.93	0	3.159	5.81e-100
TOP2A	ENSG00000131747.14	25.141	2	3.123	9.14e-144
MMP1	ENSG00000196611.4	16.16	0.98	3.115	1.31e-52
MMP12	ENSG00000262406.2	9.03	0.19	3.075	7.08e-88
HS6ST2	ENSG00000171004.17	9.17	0.22	3.059	3.01e-126
CDC20	ENSG00000117399.13	22.011	1.82	3.029	3.1e-147
ALG1L	ENSG00000189366.9	11.77	0.57	3.024	7.81e-114
XIST	ENSG00000229807.9	12.45	0.67	3.01	8.05e-09
GOLM1	ENSG00000135052.16	105.939	12.41	2.995	1.53e-196
PPP1R14D	ENSG00000166143.9	7.72	0.1	2.987	1.6e-84
KIAA0101	ENSG00000166803.10	28.01	2.67	2.983	4.03e-149
GJB2	ENSG00000165474.5	9.99	0.41	2.962	3.01e-103
SMIM22	ENSG00000267795.5	235.208	29.4	2.958	1.06e-109
ETV4	ENSG00000175832.12	25.021	2.36	2.953	7.31e-154
EPN3	ENSG00000049283.17	10.36	0.49	2.931	2.3e-160
IGHG1	ENSG00000211896.6	4565.64	598.081	2.93	6.24e-48
AC005255.3	ENSG00000256210.3	6.55	0	2.916	3.47e-103
GCNT3	ENSG00000140297.12	8.79	0.3	2.913	1.17e-86
LINC00511	ENSG00000227036.6	17.75	1.54	2.884	1.52e-141
BPIFA1	ENSG00000198183.11	11.96	0.76	2.88	4.96e-31
PODXL2	ENSG00000114631.10	22.7	2.23	2.875	1.06e-105
CENPF	ENSG00000117724.12	16.37	1.41	2.85	7.47e-129
FUT2	ENSG00000176920.11	11.04	0.7	2.824	9.43e-137
TPX2	ENSG00000088325.15	14.67	1.23	2.813	5.76e-129
IGHG2	ENSG00000211893.3	738.471	104.821	2.805	8.19e-43
IGHV1-69-2	ENSG00000280411.1	88.327	11.8	2.803	3.83e-43
RN7SL1	ENSG00000276168.1	1015.94	145.562	2.795	1.18e-81
CD24	ENSG00000272398.5	189.479	26.841	2.774	4.88e-77
PROM2	ENSG00000155066.15	22.54	2.45	2.77	1.56e-134
IGKV3-15	ENSG00000244437.1	280.974	40.91	2.75	3.37e-47
RP11-10G12.1	ENSG00000244538.1	5.7	0	2.744	1.75e-110
EPCAM	ENSG00000119888.10	417.229	61.669	2.738	1.53e-157
BIRC5	ENSG00000089685.14	14.47	1.32	2.737	2.69e-121
OCIAD2	ENSG00000145247.11	199.465	29.151	2.733	4.1e-190
IGKV3D-15	ENSG00000224041.3	8.62	0.47	2.71	1.53e-60
COL11A1	ENSG00000060718.18	6.93	0.22	2.7	1.52e-72
MMP7	ENSG00000137673.8	43.299	5.83	2.697	1.35e-48
DSP	ENSG00000096696.13	38.03	5.07	2.685	1.4e-94
UBE2T	ENSG00000077152.9	24.13	2.93	2.677	6.8e-167
AP000349.2	ENSG00000280178.1	5.83	0.07	2.674	6.12e-98
CLDN3	ENSG00000165215.6	78.973	11.54	2.673	5.74e-91
HSPB1P1	ENSG00000236060.2	8.61	0.51	2.67	2.89e-68
EIF5AP4	ENSG00000234743.1	6.78	0.23	2.661	8.51e-155
CCNB1	ENSG00000134057.14	30.42	3.97	2.66	1.98e-156
IGHV3-21	ENSG00000211947.2	112.049	16.89	2.66	1.47e-42
SIX1	ENSG00000126778.8	8.84	0.56	2.657	1.56e-83
U91328.1	ENSG00000281052.1	5.23	0	2.639	1.21e-11
NEK2	ENSG00000117650.12	7.93	0.44	2.633	1.37e-144
IGKV1-33	ENSG00000242076.2	262.031	41.679	2.624	1.37e-41
IGKV1D-33	ENSG00000239975.2	5.16	0	2.623	7.26e-71
IGKV4-1	ENSG00000211598.2	255.273	40.91	2.612	6.05e-48
RRM2	ENSG00000171848.13	19.061	2.29	2.608	8.68e-114
C1orf106	ENSG00000163362.10	29.229	3.97	2.605	5.12e-124
IGHV3-43	ENSG00000232216.1	15.58	1.77	2.581	1.51e-42
Metazoa_SRP	ENSG00000274012.1	1296.49	216.286	2.578	4.37e-63
RHOV	ENSG00000104140.6	9.03	0.69	2.569	1.53e-68
HMGN1P37	ENSG00000229237.2	4.88	0	2.556	8.95e-142
SEZ6L2	ENSG00000174938.14	31.219	4.48	2.556	5.04e-87
ZWINT	ENSG00000122952.16	21.55	2.88	2.539	6.23e-149
IGLC3	ENSG00000211679.2	1737.02	298.522	2.537	1e-38
IGHV5-51	ENSG00000211966.2	97.7	16.151	2.525	1.18e-38
PLEK2	ENSG00000100558.8	13.62	1.55	2.519	2.61e-158
RP11-667K14.4	ENSG00000262533.1	4.72	0	2.516	4.73e-63
IGHV1-24	ENSG00000211950.2	33.139	5.01	2.506	4.15e-40
CCNB2	ENSG00000157456.7	12.96	1.46	2.505	1.05e-131
HNRNPCP2	ENSG00000204253.4	15.3	1.88	2.501	8.18e-173
IGHV1-18	ENSG00000211945.2	86.569	14.53	2.495	3.11e-41
IGKV1D-39	ENSG00000251546.1	486.669	85.603	2.493	2.53e-36
CA9	ENSG00000107159.12	5.4	0.14	2.489	1.2e-59
IGLV3-25	ENSG00000211659.2	150.184	26.051	2.483	2.94e-35
IGLV2-23	ENSG00000211660.3	151.743	26.35	2.481	3.39e-41
IGKC	ENSG00000211592.6	10717.6	1920.01	2.48	3.49e-45
ST6GALNAC1	ENSG00000070526.14	35.099	5.51	2.471	1.23e-52
IGHG3	ENSG00000211897.7	663.935	119.651	2.462	4.16e-47
CEP55	ENSG00000138180.15	8.5	0.73	2.457	1.42e-133
IGHV3-23	ENSG00000211949.3	201.843	36.051	2.453	9.21e-41
GREM1	ENSG00000166923.10	7.25	0.51	2.45	3.47e-58
DSG2	ENSG00000046604.12	32.669	5.17	2.448	1.58e-110
IGHV1-69	ENSG00000211973.2	16.999	2.34	2.43	6.99e-32
IGLC2	ENSG00000211677.2	3240.95	602.993	2.424	9.03e-37
IGKV1-5	ENSG00000243466.1	235.681	43.119	2.423	8.88e-42
RP11-649E7.5	ENSG00000258377.1	6.72	0.44	2.423	1.69e-46
ANLN	ENSG00000011426.10	10.16	1.09	2.417	1.2e-118
TOX3	ENSG00000103460.16	7.64	0.62	2.415	1.28e-79
ARSE	ENSG00000157399.14	10.74	1.21	2.409	2.88e-52
IGLV3-21	ENSG00000211662.2	92.142	16.6	2.404	9.34e-37
SLC2A1	ENSG00000117394.19	68.09	12.09	2.4	1.42e-93
LAD1	ENSG00000159166.13	70.668	12.62	2.396	4.07e-111
IGHV4-31	ENSG00000231475.3	17.19	2.47	2.39	5.69e-37
TK1	ENSG00000167900.11	39.439	6.74	2.385	8.35e-120
WFDC3	ENSG00000124116.18	12.74	1.64	2.38	1.1e-70
IGKV3-20	ENSG00000239951.1	681.23	130.191	2.379	6.73e-43
IGKV3-11	ENSG00000241351.2	833.361	159.675	2.377	4.03e-45
MUC21	ENSG00000204544.5	9.86	1.09	2.377	1.77e-45
CBLC	ENSG00000142273.10	11.58	1.43	2.372	6.27e-138
BCL2L15	ENSG00000188761.11	9.55	1.07	2.35	3.56e-85
SMPDL3B	ENSG00000130768.14	34.83	6.03	2.35	6.84e-108
S100P	ENSG00000163993.6	182.91	35.24	2.343	3.89e-27
DNAJC12	ENSG00000108176.14	11.56	1.5	2.329	7.24e-68
MUC3A	ENSG00000169894.17	9.58	1.11	2.326	6.68e-56
ANKRD22	ENSG00000152766.5	10.22	1.24	2.325	1.18e-71
IGLV3-1	ENSG00000211673.2	156.497	30.46	2.324	1.79e-33
PVRL4	ENSG00000143217.8	23.821	3.96	2.323	3.73e-115
RP1-241P17.4	ENSG00000228532.4	20.92	3.38	2.323	2.04e-56
CDKN3	ENSG00000100526.19	12.74	1.75	2.321	5.57e-112
FDCSP	ENSG00000181617.5	4.49	0.1	2.319	1.34e-37
IGKV1-17	ENSG00000240382.3	86.882	16.62	2.318	1.73e-31
SPTBN2	ENSG00000173898.11	17.771	2.77	2.316	1.65e-139
UBE2SP2	ENSG00000224126.2	5.56	0.32	2.313	3.06e-139
CDCA7	ENSG00000144354.13	8.98	1.01	2.312	8.58e-105
RP11-316M1.12	ENSG00000259357.2	7.41	0.7	2.307	1.54e-40
RP11-73M18.2	ENSG00000256500.5	3.89	0	2.29	5.35e-56
IGSF9	ENSG00000085552.16	6.56	0.55	2.286	7.35e-119
IGKV1-27	ENSG00000244575.3	65.059	12.55	2.285	6.32e-29
IGHV4-34	ENSG00000211956.2	50.07	9.52	2.279	2.67e-33
IGHV3-11	ENSG00000211941.3	57.531	11.12	2.272	4.94e-36
HN1	ENSG00000189159.15	279.828	57.209	2.27	2.77e-168
FOXM1	ENSG00000111206.12	12.8	1.87	2.266	3.19e-107
PAFAH1B3	ENSG00000079462.7	54.462	10.63	2.254	1.82e-178
WFDC2	ENSG00000101443.17	755.924	157.695	2.254	1.94e-52
PITX1	ENSG00000069011.15	4.62	0.18	2.252	4.14e-75
IGLV3-19	ENSG00000211663.2	129.364	26.451	2.248	1.55e-35
IGLC1	ENSG00000211675.2	1205.57	255.007	2.237	3.21e-39
CTC-425F1.4	ENSG00000267458.1	21.93	3.87	2.235	3.93e-34
RMI2	ENSG00000175643.8	12.5	1.88	2.229	3e-157
SGPP2	ENSG00000163082.9	23.75	4.32	2.218	4.06e-65
GJB1	ENSG00000169562.9	5.6	0.42	2.217	7.18e-33
AURKA	ENSG00000087586.17	11.85	1.78	2.209	1.07e-129
ESPN	ENSG00000187017.14	10.09	1.4	2.208	8.13e-50
METTL7B	ENSG00000170439.6	9.81	1.34	2.208	2.77e-69
UHRF1	ENSG00000276043.4	7.25	0.79	2.204	6.68e-123
TPD52	ENSG00000076554.15	67.102	13.84	2.198	2.36e-124
IGKV1-9	ENSG00000241755.1	92.443	19.471	2.191	4.89e-34
KIF20A	ENSG00000112984.11	6.76	0.71	2.182	6.25e-129
IGHV4-39	ENSG00000211959.2	75.019	15.76	2.181	8.26e-31
IGLV6-57	ENSG00000211640.3	41.821	8.45	2.18	4.05e-35
NME1	ENSG00000239672.7	135.692	29.181	2.179	2.65e-117
GALNT14	ENSG00000158089.14	9.72	1.37	2.177	1.26e-68
MELK	ENSG00000165304.7	6.41	0.64	2.176	4.86e-111
IGHV3-30	ENSG00000270550.1	188.915	41.049	2.175	9.82e-31
IGKV1-16	ENSG00000240864.3	63.46	13.29	2.173	9.05e-30
IGHV3-15	ENSG00000211943.2	62.869	13.17	2.172	7.29e-34
IGHV1-2	ENSG00000211934.3	48.772	10.06	2.17	2.82e-27
PHLDA2	ENSG00000181649.5	32.619	6.48	2.168	1.15e-83
IGLV1-44	ENSG00000211651.3	134.158	29.09	2.167	8.15e-30
IGKV3D-20	ENSG00000211625.2	12.3	1.97	2.163	3.62e-40
RP11-350J20.12	ENSG00000273132.1	8.14	1.05	2.157	3.49e-71
SYT7	ENSG00000011347.9	11.7	1.85	2.156	1.5e-86
TRIP13	ENSG00000071539.13	8.63	1.16	2.156	1.37e-102
RP11-452N17.1	ENSG00000277998.1	38.239	7.81	2.155	3.52e-93
CD79A	ENSG00000105369.9	22.441	4.31	2.142	1.71e-46
SERINC2	ENSG00000168528.11	106.661	23.429	2.14	4.25e-129
RP3-340N1.2	ENSG00000227066.1	3.79	0.09	2.136	7.99e-74
MESP1	ENSG00000166823.5	7	0.83	2.128	2.68e-108
DLGAP5	ENSG00000126787.12	5.15	0.41	2.125	1e-116
IGKV1-8	ENSG00000240671.2	45.11	9.58	2.124	2.39e-30
IGLV1-40	ENSG00000211653.2	211.673	47.871	2.122	7.54e-36
CXCL14	ENSG00000145824.12	18.61	3.52	2.117	7.85e-26
TROAP	ENSG00000135451.12	10.23	1.59	2.116	5.22e-97
CTB-63M22.1	ENSG00000229119.3	145.028	32.701	2.115	8.53e-47
PSAT1	ENSG00000135069.13	12.37	2.1	2.109	4.82e-63
GPT2	ENSG00000166123.13	13.53	2.37	2.108	2.05e-123
RPL37P6	ENSG00000241431.1	3.31	0	2.108	2.23e-110
SAPCD2	ENSG00000186193.8	5.12	0.42	2.108	4e-147
MUC16	ENSG00000181143.15	5.46	0.5	2.107	1.01e-26
FERMT1	ENSG00000101311.15	6.18	0.67	2.104	1.35e-124
NQO1	ENSG00000181019.12	151.135	34.379	2.104	6.64e-71
IGHV2-70	ENSG00000211974.3	7.12	0.89	2.103	5.48e-30
RHBDL2	ENSG00000158315.10	6.34	0.71	2.102	2.75e-127
IGHV1-46	ENSG00000211962.2	18.191	3.48	2.099	1.15e-32
ASF1B	ENSG00000105011.8	10.29	1.64	2.096	3.18e-123
HABP2	ENSG00000148702.14	3.74	0.11	2.094	1.7e-45
EEF1A2	ENSG00000101210.10	6.97	0.87	2.092	1.5e-52
MUC20	ENSG00000176945.16	43.691	9.49	2.091	2.09e-60
IGLV1-47	ENSG00000211648.2	112.68	25.71	2.09	1.07e-30
CENPA	ENSG00000115163.14	5.96	0.64	2.085	6.86e-112
BARX2	ENSG00000043039.6	3.82	0.14	2.08	1.34e-72
S100A2	ENSG00000196754.10	25	5.15	2.08	2.21e-40
MAD2L1	ENSG00000164109.13	11.2	1.89	2.078	2.22e-120
KIF2C	ENSG00000142945.12	7.41	1	2.072	4.18e-114
PTTG1	ENSG00000164611.12	37.121	8.07	2.071	8.39e-113
IGKV1-12	ENSG00000243290.1	10.15	1.66	2.067	2.16e-36
NUF2	ENSG00000143228.12	6.53	0.8	2.065	2.63e-111
Metazoa_SRP	ENSG00000278771.1	4.72	0.37	2.062	8.85e-72
IGKV2-28	ENSG00000244116.3	276.991	65.698	2.059	2.85e-27
KRT80	ENSG00000167767.13	15.55	2.98	2.056	3.24e-81
IGHV3-49	ENSG00000211965.3	22.59	4.68	2.054	5.49e-28
CXCL9	ENSG00000138755.5	22.91	4.77	2.051	5.23e-23
AURKB	ENSG00000178999.12	12.26	2.22	2.042	1.67e-98
IGHV4-59	ENSG00000224373.3	76.59	17.85	2.041	6.44e-31
MANEAL	ENSG00000185090.14	11.23	1.98	2.037	4.01e-101
AC009065.4	ENSG00000279473.1	3.09	0	2.032	2.4e-108
ATP1B1	ENSG00000143153.12	241.486	58.338	2.031	1.7e-87
TFAP2A	ENSG00000137203.10	4.68	0.39	2.031	4.92e-84
NCAPH	ENSG00000121152.9	6.84	0.92	2.03	1.1e-112
CDC6	ENSG00000094804.9	6.34	0.8	2.028	4.04e-97
LGSN	ENSG00000146166.16	3.61	0.13	2.028	2.84e-71
MKI67	ENSG00000148773.12	8.7	1.38	2.027	8.1e-97
EPHX3	ENSG00000105131.7	11.16	1.99	2.024	7.76e-79
CDCA8	ENSG00000134690.10	7.86	1.18	2.023	1.73e-131
SLC25A10	ENSG00000183048.11	27.131	5.92	2.023	1.37e-169
RP6-65G23.3	ENSG00000259153.1	5.37	0.57	2.021	4.87e-140
AOC1	ENSG00000002726.19	3.98	0.23	2.017	4.06e-62
CDK1	ENSG00000170312.15	17.36	3.54	2.016	1.35e-106
LSR	ENSG00000105699.16	155.772	37.77	2.016	4.61e-127
GYLTL1B	ENSG00000165905.16	19.471	4.07	2.013	1.63e-92
ADGRF1	ENSG00000153292.15	14.93	2.95	2.012	2.39e-22
CDCA5	ENSG00000146670.9	8.5	1.36	2.009	1.86e-104
LAPTM4B	ENSG00000104341.16	127.406	31.04	2.003	3.43e-116
CKMT1A	ENSG00000223572.9	6.49	0.87	2.002	2.21e-50
CDH1	ENSG00000039068.18	105.28	25.591	1.999	5.05e-101
PAEP	ENSG00000122133.16	3.39	0.1	1.997	1.41e-45
IGHV3-73	ENSG00000211976.2	16.95	3.51	1.993	5.37e-32
KIFC1	ENSG00000237649.7	10.06	1.78	1.992	4.27e-104
HMGN1P36	ENSG00000235734.4	2.95	0	1.982	2.17e-114
IGLL5	ENSG00000254709.6	118.989	29.459	1.978	4.37e-35
ST14	ENSG00000149418.10	94.91	23.381	1.976	1.11e-130
RP11-624G17.3	ENSG00000255301.1	4.15	0.31	1.975	1.01e-83
SLC29A4	ENSG00000164638.10	6.89	1.01	1.973	5.62e-89
PLK1	ENSG00000166851.14	12.32	2.4	1.97	1.28e-110
REEP6	ENSG00000115255.10	10.12	1.84	1.969	7.5e-74
FAM83H-AS1	ENSG00000203499.10	18.27	3.93	1.967	1.12e-100
SDC1	ENSG00000115884.10	212.423	53.649	1.965	2.54e-93
IGLC7	ENSG00000211685.3	19.05	4.14	1.964	5.76e-23
IGHM	ENSG00000211899.7	350.701	89.219	1.963	2.42e-21
CKMT1B	ENSG00000237289.9	6.24	0.86	1.961	1.71e-54
RASAL1	ENSG00000111344.11	4.29	0.36	1.96	5.05e-92
TMEM45B	ENSG00000151715.7	29.629	6.87	1.96	2.3e-85
DERL3	ENSG00000099958.14	36.75	8.73	1.956	1.04e-58
MARCKSL1	ENSG00000175130.6	139.381	35.17	1.956	4.87e-112
KIF4A	ENSG00000090889.11	4.04	0.3	1.955	1.77e-119
KCNN4	ENSG00000104783.11	31.421	7.37	1.954	3.3e-44
SNRPEP2	ENSG00000256968.1	11.61	2.26	1.952	1.65e-127
CLIC6	ENSG00000159212.12	34.09	8.08	1.95	4.68e-28
DBNDD1	ENSG00000003249.13	18.88	4.15	1.949	1.24e-132
SBK1	ENSG00000188322.4	5.99	0.81	1.949	6.64e-100
MET	ENSG00000105976.14	30.93	7.29	1.946	1.25e-38
TXNDC17	ENSG00000129235.10	252.247	64.928	1.942	2.59e-137
IGHV3-33	ENSG00000211955.2	94.64	23.94	1.939	3.5e-29
SPAG4	ENSG00000061656.9	22.161	5.04	1.939	3.09e-101
KCNK1	ENSG00000135750.14	21.13	4.8	1.932	1.99e-59
TMEM92	ENSG00000167105.7	18.52	4.12	1.931	4.05e-76
FAM3C2	ENSG00000174028.6	32.88	7.89	1.93	7.4e-80
IGKV1-6	ENSG00000239855.1	33.871	8.17	1.927	1.9e-25
PTPRH	ENSG00000080031.9	3.26	0.12	1.927	2.94e-83
SOX4	ENSG00000124766.5	40.621	9.95	1.926	1.12e-118
HMMR	ENSG00000072571.19	5.11	0.61	1.924	1.09e-114
SNRPGP2	ENSG00000264350.1	20.629	4.71	1.921	1.92e-104
NGEF	ENSG00000066248.14	4.6	0.48	1.92	5.91e-74
IGFBP3	ENSG00000146674.14	125.922	32.57	1.919	6.28e-69
MUC4	ENSG00000145113.21	19.16	4.33	1.919	1.31e-24
KRT17	ENSG00000128422.15	20.941	4.81	1.917	2.8e-21
PPIAP22	ENSG00000198618.5	255.007	66.782	1.917	6.15e-137
CLDN4	ENSG00000189143.9	289.977	76.24	1.913	6.21e-84
IGKV2D-29	ENSG00000243264.2	18.21	4.1	1.913	4.52e-32
LAMB3	ENSG00000196878.12	111.26	28.819	1.913	6.12e-49
SCG5	ENSG00000166922.8	5.84	0.82	1.91	6.21e-73
PLS1	ENSG00000120756.12	20.3	4.67	1.909	7.33e-93
AL158801.1	ENSG00000279392.1	4.96	0.59	1.906	1.97e-102
PKMYT1	ENSG00000127564.16	11.25	2.27	1.905	5.97e-101
GALNT6	ENSG00000139629.15	15.02	3.28	1.904	3.8e-67
KRT8	ENSG00000170421.11	783.668	208.643	1.904	2.6e-94
LGR4	ENSG00000205213.13	14.05	3.03	1.901	1.66e-104
MEX3A	ENSG00000254726.2	4.22	0.4	1.899	2.55e-108
FOXA1	ENSG00000129514.5	27.739	6.76	1.889	5.74e-81
RP11-544M22.13	ENSG00000270149.5	3.77	0.29	1.887	8.37e-43
STRA6	ENSG00000137868.18	3.53	0.23	1.881	1.51e-61
SLC44A4	ENSG00000204385.10	55.768	14.47	1.876	1.31e-28
IGHV1-3	ENSG00000211935.3	3.5	0.23	1.871	1.06e-14
EFNA4	ENSG00000243364.7	20.831	4.98	1.868	1.1e-163
RPS2P55	ENSG00000216866.5	5.35	0.74	1.868	1.69e-131
SRD5A3	ENSG00000128039.10	53.589	13.95	1.868	8.96e-97
TMEM184A	ENSG00000164855.15	14.1	3.14	1.867	1.91e-103
RP4-800G7.1	ENSG00000239719.1	2.64	0	1.864	1.65e-26
GINS1	ENSG00000101003.9	4.33	0.47	1.858	1.72e-130
IGHV4-4	ENSG00000276775.1	12.62	2.77	1.853	5.56e-22
TNFRSF21	ENSG00000146072.6	60.48	16.06	1.849	6.69e-100
IL4I1	ENSG00000104951.15	8.97	1.77	1.848	1.77e-69
KIAA1324	ENSG00000116299.16	13.36	2.99	1.848	4.87e-28
IGLV1-51	ENSG00000211644.2	158.462	43.389	1.845	5.3e-25
FA2H	ENSG00000103089.8	8.01	1.51	1.844	2.94e-83
MSL3P1	ENSG00000224287.2	3.74	0.32	1.844	2.12e-125
YWHAZP5	ENSG00000213260.3	3.74	0.32	1.844	1.67e-105
COL1A1	ENSG00000108821.13	381.251	105.799	1.84	2.4e-40
COL17A1	ENSG00000065618.16	4.46	0.53	1.835	3e-44
IGKV3D-11	ENSG00000211632.3	5.24	0.75	1.834	1.44e-47
IGLV4-69	ENSG00000211637.2	32.271	8.35	1.831	1.32e-24
LY6K	ENSG00000160886.13	5.44	0.81	1.831	1.29e-36
MAL2	ENSG00000147676.13	173.488	48.06	1.831	8.59e-73
CH507-513H4.5	ENSG00000281383.1	3.9	0.38	1.828	2.15e-50
SLC35F2	ENSG00000110660.14	14.14	3.28	1.823	1.27e-128
RP11-783K16.5	ENSG00000256940.1	4.62	0.59	1.822	1.11e-106
BUB1	ENSG00000169679.14	6.55	1.14	1.819	3.08e-102
IGHV3-48	ENSG00000211964.3	8.46	1.69	1.814	3.44e-28
TSPAN1	ENSG00000117472.9	64.901	17.74	1.814	6.68e-14
GPX2	ENSG00000176153.11	7.46	1.41	1.812	2.69e-32
FAM64A	ENSG00000129195.15	4.19	0.48	1.81	2.34e-101
ITGB4	ENSG00000132470.13	71.818	19.76	1.81	1.65e-44
IGLV3-10	ENSG00000211669.2	52.24	14.19	1.809	3.36e-19
ZP3	ENSG00000188372.14	10	2.14	1.809	2.46e-63
CHIT1	ENSG00000133063.15	21.52	5.43	1.808	1.79e-07
CEACAM6	ENSG00000086548.8	607.819	173.176	1.805	1.5e-16
PTGES	ENSG00000148344.10	19.22	4.8	1.802	5.63e-60
FUT3	ENSG00000171124.12	18.16	4.5	1.801	2.52e-59
IGHV2-70	ENSG00000274576.2	22.19	5.66	1.8	9.03e-20
CH17-224D4.2	ENSG00000282651.1	5.02	0.73	1.799	1.39e-18
SOX2	ENSG00000181449.3	3.8	0.38	1.798	4.18e-32
MSMB	ENSG00000263639.5	6.47	1.15	1.797	3.21e-15
NUSAP1	ENSG00000137804.12	14.49	3.46	1.796	9.63e-94
ARAP1-AS1	ENSG00000256007.1	7.85	1.55	1.795	1.22e-11
PBK	ENSG00000168078.9	3.85	0.4	1.793	1.7e-96
TYMS	ENSG00000176890.15	26.21	6.85	1.793	7.8e-88
BIK	ENSG00000100290.2	7.76	1.53	1.792	1.85e-89
RP11-498C9.13	ENSG00000263585.1	2.46	0	1.791	3.46e-31
IGHV3-74	ENSG00000224650.2	27.839	7.35	1.788	1.55e-26
CDT1	ENSG00000167513.8	6.42	1.15	1.787	3.73e-100
NCAPG	ENSG00000109805.9	4.52	0.6	1.787	3.65e-97
RP11-464D20.2	ENSG00000239246.3	5.3	0.83	1.784	1.92e-78
IGKV6-21	ENSG00000211611.2	10.59	2.37	1.782	3.11e-27
KIF11	ENSG00000138160.5	4.97	0.74	1.779	1.56e-119
KRTCAP3	ENSG00000157992.12	79.219	22.389	1.778	1.97e-97
PKIB	ENSG00000135549.14	9.24	1.99	1.776	1.07e-53
IGHV6-1	ENSG00000211933.2	10.67	2.42	1.771	2.55e-25
CDKN2A	ENSG00000147889.16	10.05	2.24	1.77	5.42e-34
IGLV2-11	ENSG00000211668.2	117.481	34.04	1.758	4.16e-23
NMU	ENSG00000109255.11	3.7	0.39	1.758	2.19e-55
MMP13	ENSG00000137745.11	2.41	0.01	1.755	3.28e-52
CCNO	ENSG00000152669.8	4.59	0.66	1.752	2.73e-40
EFNA3	ENSG00000143590.13	5.9	1.05	1.751	6.76e-141
TMPRSS13	ENSG00000137747.14	11.74	2.8	1.745	3.53e-74
AHNAK2	ENSG00000185567.6	18.36	4.78	1.744	7.18e-33
RP5-890E16.4	ENSG00000266341.1	2.35	0	1.744	1.39e-27
CLDN1	ENSG00000163347.5	20.831	5.55	1.737	4.35e-29
HMGA1	ENSG00000137309.19	132.77	39.14	1.737	1.6e-93
TFAP2C	ENSG00000087510.6	7.59	1.58	1.735	1.23e-82
CNFN	ENSG00000105427.9	5.5	0.96	1.73	6.28e-101
TFPI2	ENSG00000105825.11	17.38	4.54	1.73	2.35e-18
CENPM	ENSG00000100162.14	11.68	2.83	1.727	3.13e-65
NDC80	ENSG00000080986.12	5.32	0.91	1.726	1.59e-90
PDIA4	ENSG00000155660.10	179.681	53.6	1.726	5.95e-124
PRR11	ENSG00000068489.12	5.55	0.98	1.726	7.37e-93
IGLV3-9	ENSG00000211670.2	9.84	2.28	1.725	2.06e-27
IGHV4-61	ENSG00000211970.3	24.729	6.79	1.724	7.18e-26
MCM4	ENSG00000104738.16	25.5	7.03	1.723	2.34e-106
KDELR3	ENSG00000100196.10	34.21	9.67	1.722	6.16e-91
PAICS	ENSG00000128050.8	44.55	12.85	1.718	1.87e-128
GINS2	ENSG00000131153.8	4.26	0.6	1.717	2.38e-114
IGKV3OR2-268	ENSG00000233999.3	3.24	0.29	1.717	3.77e-55
PCP4	ENSG00000183036.10	4.03	0.53	1.717	3.77e-43
SYT12	ENSG00000173227.13	2.55	0.08	1.717	8.86e-67
C16orf59	ENSG00000162062.14	4.45	0.66	1.715	1.05e-129
WNT7B	ENSG00000188064.9	9.33	2.15	1.713	1.12e-48
SLC27A2	ENSG00000140284.10	5.67	1.04	1.709	1.27e-47
MZB1	ENSG00000170476.15	47.3	13.78	1.708	2.61e-27
PRR36	ENSG00000183248.11	5.66	1.04	1.707	3.42e-89
CDC45	ENSG00000093009.9	5.55	1.01	1.704	3.68e-91
IGHV2-5	ENSG00000211937.3	45.67	13.34	1.702	1.06e-19
TLCD1	ENSG00000160606.10	33.249	9.53	1.702	2.46e-119
RPL39L	ENSG00000163923.9	20.619	5.68	1.694	4.98e-82
SNORA73A	ENSG00000274266.1	2.23	0	1.692	4.39e-11
PIGY	ENSG00000255072.1	10.45	2.55	1.689	2.11e-17
RNA5-8S5	ENSG00000275215.1	1090.52	337.536	1.689	2.76e-35
RNA5-8S5	ENSG00000277739.1	1090.52	337.536	1.689	2.76e-35
RNA5-8S5	ENSG00000278189.1	1090.52	337.536	1.689	2.76e-35
RNA5-8S5	ENSG00000278233.1	1090.52	337.536	1.689	2.76e-35
CHRNA5	ENSG00000169684.13	3.63	0.44	1.685	2.93e-78
EXO1	ENSG00000174371.16	3.5	0.4	1.685	9.2e-108
PLEKHS1	ENSG00000148735.14	4.66	0.76	1.685	4.7e-13
CDCA3	ENSG00000111665.11	10.2	2.49	1.682	4.21e-82
SFN	ENSG00000175793.11	149.675	45.972	1.682	1.26e-41
ZFPM2-AS1	ENSG00000251003.7	2.62	0.13	1.68	4.83e-66
LYPD1	ENSG00000150551.10	4.76	0.8	1.678	3.37e-60
KRT18	ENSG00000111057.10	672.084	209.701	1.676	4.23e-87
GLB1L2	ENSG00000149328.14	14.09	3.74	1.671	2.94e-54
XPR1	ENSG00000143324.13	29.24	8.51	1.669	1.22e-88
RAB25	ENSG00000132698.13	168.032	52.33	1.664	7.52e-98
ADAMDEC1	ENSG00000134028.14	4.19	0.64	1.662	8.84e-51
FAM3B	ENSG00000183844.16	24.13	6.94	1.662	1.11e-21
TESC	ENSG00000088992.17	36.181	10.75	1.662	4.2e-24
PLA2G2D	ENSG00000117215.14	2.79	0.2	1.659	1.62e-46
RP11-44F21.5	ENSG00000260265.1	3.25	0.35	1.655	6.55e-53
HJURP	ENSG00000123485.11	5.16	0.96	1.652	1.49e-81
FOXJ1	ENSG00000129654.7	12.69	3.37	1.647	7.73e-08
ASPM	ENSG00000066279.16	3.31	0.38	1.643	1.85e-104
RTN4RL2	ENSG00000186907.7	9.8	2.46	1.642	1.2e-54
SRP9P1	ENSG00000180581.7	23.91	6.98	1.642	3.57e-22
KIF26B	ENSG00000162849.15	4.27	0.69	1.641	9.14e-79
SLC39A11	ENSG00000133195.11	32.05	9.6	1.641	1.25e-138
MCM2	ENSG00000073111.13	14.21	3.88	1.64	8.15e-107
SLC22A18AS	ENSG00000254827.5	4.39	0.73	1.639	2.31e-78
GYG2	ENSG00000056998.18	4.23	0.68	1.638	6.11e-98
IGHV3-53	ENSG00000211967.3	8.29	1.99	1.635	5.35e-31
P2RY6	ENSG00000171631.14	8.52	2.07	1.633	1.56e-69
BOLA2B	ENSG00000169627.7	116.5	36.969	1.63	5.34e-137
SULF1	ENSG00000137573.13	35.49	10.79	1.63	1.35e-46
IGLV8-61	ENSG00000211638.2	24.8	7.35	1.628	2.16e-18
KPNA2	ENSG00000182481.8	57.699	18.08	1.621	3.84e-95
ADM2	ENSG00000128165.8	3.72	0.54	1.616	4.7e-103
LCN2	ENSG00000148346.11	126.719	40.881	1.609	1.49e-23
CTA-384D8.35	ENSG00000272666.1	6.59	1.49	1.608	2.18e-78
RORC	ENSG00000143365.16	20.48	6.05	1.607	6.17e-42
SPINT2	ENSG00000167642.12	545.599	178.576	1.606	3.25e-105
AC239868.2	ENSG00000280874.1	31.979	9.84	1.605	2.3e-24
HGD	ENSG00000113924.11	6.05	1.32	1.604	9.29e-39
RAC3	ENSG00000169750.8	15.55	4.45	1.602	2.69e-83
IGLV2-14	ENSG00000211666.2	265.689	86.912	1.601	5.99e-22
GALNT7	ENSG00000109586.11	21.259	6.35	1.599	2.09e-118
CENPU	ENSG00000151725.11	9.61	2.52	1.592	6.29e-93
CHEK1	ENSG00000149554.12	6.44	1.47	1.591	1.54e-101
SORD2P	ENSG00000259479.6	6.38	1.45	1.591	7.18e-106
IGKV2-24	ENSG00000241294.1	39.33	12.4	1.59	1.39e-17
IQGAP3	ENSG00000183856.10	5.18	1.06	1.585	1.98e-81
MAGED4	ENSG00000154545.16	4.1	0.7	1.585	2.28e-48
ARHGAP40	ENSG00000124143.10	3.46	0.49	1.582	3.68e-47
PPP1R14B	ENSG00000173457.10	169.565	56.219	1.576	2.78e-109
IGKV1D-16	ENSG00000241244.1	6.03	1.36	1.575	3.31e-22
AP1M2	ENSG00000129354.11	62.27	20.31	1.57	1.69e-104
MND1	ENSG00000121211.7	3.78	0.61	1.57	1.72e-108
YWHAZP4	ENSG00000213131.3	2.86	0.3	1.57	1.22e-113
VSTM2L	ENSG00000132821.11	31.31	9.89	1.569	6e-22
AC239868.3	ENSG00000281134.1	31.979	10.13	1.567	9.79e-25
XDH	ENSG00000158125.9	2.26	0.1	1.567	5.99e-79
C2CD4A	ENSG00000198535.5	2.28	0.11	1.563	2.06e-59
CXCL10	ENSG00000169245.5	21.561	6.64	1.562	8.17e-20
LEMD1	ENSG00000186007.9	3.43	0.5	1.562	1.94e-45
RAD51	ENSG00000051180.16	4.64	0.91	1.562	2.48e-97
AK4	ENSG00000162433.14	7.38	1.84	1.561	1.29e-43
ASPHD1	ENSG00000174939.10	6.05	1.39	1.561	6.87e-52
FAM111B	ENSG00000189057.10	3.01	0.36	1.56	4.76e-72
PRDX4	ENSG00000123131.12	154.439	51.721	1.56	2.65e-121
PLEKHA6	ENSG00000143850.12	10.11	2.77	1.559	5.99e-56
IGHV3-7	ENSG00000211938.2	40.489	13.11	1.556	1.52e-16
DTL	ENSG00000143476.17	4.9	1.01	1.554	1.6e-73
IGHV2-26	ENSG00000211951.2	10.01	2.75	1.554	2.53e-23
SUSD4	ENSG00000143502.14	7.28	1.82	1.554	1.08e-34
IGKV1-39	ENSG00000242371.1	6.66	1.61	1.553	9.28e-21
IGF2BP3	ENSG00000136231.13	3.83	0.65	1.55	9.72e-48
EGLN3	ENSG00000129521.13	21.9	6.84	1.546	2.57e-35
TMEM106B	ENSG00000106460.18	28.709	9.19	1.544	1.53e-121
TCEA1P2	ENSG00000230409.3	6.08	1.43	1.543	1.71e-59
IGKV2D-40	ENSG00000251039.2	4.62	0.93	1.542	1.35e-19
DEPDC1B	ENSG00000035499.12	2.84	0.32	1.541	2.33e-107
BPIFB1	ENSG00000125999.10	24.299	7.7	1.54	0.000641
GPR160	ENSG00000173890.16	24.501	7.77	1.54	1.74e-46
IGKV1D-13	ENSG00000276566.1	6.88	1.71	1.54	4.58e-14
H2BFS	ENSG00000234289.5	9.56	2.64	1.537	1.45e-69
FHL2	ENSG00000115641.18	43.891	14.48	1.536	2.12e-46
SLC39A4	ENSG00000147804.9	80.918	27.24	1.536	1.43e-97
MARVELD3	ENSG00000140832.9	9.28	2.55	1.534	2.7e-122
MYEOV	ENSG00000172927.7	2.82	0.32	1.533	4.39e-54
PCAT6	ENSG00000228288.6	5.83	1.36	1.533	7.36e-118
CHMP4C	ENSG00000164695.4	16.29	4.98	1.532	1.41e-105
CTD-3193O13.11	ENSG00000268120.1	4.55	0.92	1.531	4.05e-64
AMACR	ENSG00000242110.7	14.63	4.42	1.528	4.03e-93
ALDH18A1	ENSG00000059573.8	37.749	12.46	1.526	1.16e-140
DHFRP1	ENSG00000188985.6	5.93	1.41	1.524	4.14e-72
ILDR1	ENSG00000145103.12	7.25	1.87	1.523	1.42e-81
TTK	ENSG00000112742.9	3.08	0.42	1.523	1.88e-91
CCL20	ENSG00000115009.11	19.849	6.26	1.522	4.8e-12
CKS1B	ENSG00000173207.12	92.212	31.46	1.522	4.76e-118
KRT16	ENSG00000186832.8	2.36	0.17	1.522	4.81e-43
MMP9	ENSG00000100985.7	30.519	10	1.519	1.99e-26
APOC2	ENSG00000234906.8	7.69	2.04	1.515	3.43e-16
IGLV2-8	ENSG00000278196.1	67.181	22.88	1.514	9.57e-17
RP11-161H23.5	ENSG00000258232.2	138.399	47.851	1.513	1.03e-92
DEPTOR	ENSG00000155792.9	11.18	3.27	1.512	7.38e-66
NET1	ENSG00000173848.18	56.3	19.09	1.512	4.98e-79
TMEM182	ENSG00000170417.14	4.7	1	1.511	5.26e-165
SMKR1	ENSG00000240204.2	3.13	0.45	1.51	6.37e-61
VWA1	ENSG00000179403.11	92.969	32.019	1.509	1.82e-71
TRIM2	ENSG00000109654.14	19.84	6.33	1.507	2.01e-55
TMED3	ENSG00000166557.12	127.999	44.421	1.506	2.2e-123
EPHA10	ENSG00000183317.16	2.46	0.22	1.504	5e-85
RP11-480I12.5	ENSG00000214796.8	4.44	0.92	1.503	4.87e-93
SIX4	ENSG00000100625.8	3.08	0.44	1.502	5.37e-90
CCNA2	ENSG00000145386.9	6.67	1.71	1.501	2.48e-80
GFRA3	ENSG00000146013.10	2.51	0.24	1.501	7.15e-37
ESRP1	ENSG00000104413.15	44.64	15.15	1.499	1.54e-109
RP11-388M20.2	ENSG00000261385.1	3.01	0.42	1.498	1.13e-18
UGT8	ENSG00000174607.10	2.87	0.37	1.498	8.15e-48
SLC44A5	ENSG00000137968.16	2.33	0.18	1.497	1.62e-50
ITPKA	ENSG00000137825.10	3.37	0.55	1.495	4e-52
RECQL4	ENSG00000160957.12	10.64	3.13	1.495	1.01e-86
NT5E	ENSG00000135318.11	15.65	4.91	1.494	1.71e-35
LGALS3BP	ENSG00000108679.12	684.875	242.862	1.492	4.15e-64
TDRKH	ENSG00000182134.15	13.85	4.28	1.492	1.71e-116
UQCC2	ENSG00000137288.9	109.061	38.141	1.492	8.87e-124
LINC00467	ENSG00000153363.12	10.19	2.98	1.491	1.76e-112
ALDH3B2	ENSG00000132746.14	2.99	0.42	1.49	6.84e-65
ERO1L	ENSG00000197930.12	47.649	16.32	1.49	7.12e-86
GPR87	ENSG00000138271.5	2.09	0.1	1.49	2.15e-45
SOWAHB	ENSG00000186212.3	3.55	0.62	1.49	1.39e-81
FUT8	ENSG00000033170.16	26.541	8.81	1.489	1.68e-86
TUBA1C	ENSG00000167553.14	302.522	107.358	1.486	1.48e-91
SLC50A1	ENSG00000169241.17	110.002	38.73	1.482	6.31e-123
CCDC34	ENSG00000109881.16	7.71	2.12	1.481	1.44e-92
IGLV3-27	ENSG00000211658.2	9.55	2.78	1.481	1.1e-18
GALNT3	ENSG00000115339.13	31.441	10.64	1.479	5.43e-42
PLEKHG6	ENSG00000008323.15	6.11	1.55	1.479	2.14e-76
CXADR	ENSG00000154639.18	13.68	4.27	1.478	9.4e-53
GRHL2	ENSG00000083307.10	12.48	3.84	1.478	3.09e-88
BUB1B	ENSG00000156970.12	4.4	0.94	1.477	5.13e-76
RP11-204C16.4	ENSG00000217624.2	2.59	0.29	1.477	6.56e-91
RHNO1	ENSG00000171792.10	25.91	8.69	1.474	9.27e-147
CAPN12	ENSG00000182472.8	13.42	4.2	1.471	5.16e-46
CTSV	ENSG00000136943.10	3.27	0.54	1.471	1.23e-52
EIF1AXP1	ENSG00000236698.1	9.26	2.7	1.471	8.68e-54
DPP4	ENSG00000197635.9	25.82	8.68	1.47	2.16e-20
F12	ENSG00000131187.9	3.95	0.79	1.467	1.5e-87
SLAMF7	ENSG00000026751.16	16.37	5.29	1.466	1.36e-35
HN1L	ENSG00000206053.12	56.449	19.81	1.465	3.59e-126
FNDC1	ENSG00000164694.16	3.49	0.63	1.462	1.61e-49
CCDC167	ENSG00000198937.8	37.94	13.14	1.461	1.87e-116
NPM3	ENSG00000107833.10	38.101	13.22	1.459	2.73e-118
PKP3	ENSG00000184363.9	38.73	13.45	1.459	1.55e-92
APOBEC3B	ENSG00000179750.15	5.98	1.54	1.458	3.86e-52
SORD	ENSG00000140263.13	15.54	5.03	1.456	4.95e-97
PTP4A1	ENSG00000112245.9	164.073	59.272	1.454	3.42e-52
RNU1-106P	ENSG00000207110.1	1.74	0	1.454	5.75e-16
GGCT	ENSG00000006625.17	77.149	27.58	1.451	1.91e-112
SLC7A5	ENSG00000103257.8	25.08	8.54	1.451	1.47e-64
SPC25	ENSG00000152253.8	3.7	0.72	1.45	3.78e-90
TFF3	ENSG00000160180.15	49.511	17.49	1.45	1.38e-15
LINC01426	ENSG00000234380.1	2.49	0.28	1.447	7.9e-89
IGKV2D-30	ENSG00000239571.1	2.43	0.26	1.445	1.23e-29
RNF43	ENSG00000108375.12	10.05	3.06	1.445	3.99e-66
ECE2	ENSG00000145194.17	7.67	2.19	1.442	1.67e-112
ERICH5	ENSG00000177459.10	2.45	0.27	1.442	2.42e-34
HKDC1	ENSG00000156510.12	6.34	1.71	1.438	2.45e-36
VPREB3	ENSG00000128218.7	2.74	0.38	1.438	3.95e-58
STYK1	ENSG00000060140.8	3.41	0.63	1.436	1.56e-88
VWA2	ENSG00000165816.12	5.33	1.34	1.436	8.19e-39
FEN1	ENSG00000168496.3	16.79	5.58	1.435	5.1e-108
NLN	ENSG00000123213.22	10.08	3.1	1.434	1.85e-111
OTX1	ENSG00000115507.9	2	0.11	1.434	3.54e-113
PFKP	ENSG00000067057.16	62.908	22.65	1.434	1.36e-61
CH17-224D4.1	ENSG00000282639.1	2.59	0.33	1.433	6.26e-26
DEPDC1	ENSG00000024526.16	2.16	0.17	1.433	3.19e-97
PDZK1IP1	ENSG00000162366.7	92.129	33.49	1.433	2.84e-17
PERP	ENSG00000112378.11	60.858	21.919	1.432	2.14e-73
RP11-289I10.2	ENSG00000223612.3	7.14	2.02	1.43	1.85e-59
GTSE1	ENSG00000075218.18	3.82	0.79	1.429	1.05e-81
HNF4G	ENSG00000164749.11	1.85	0.06	1.427	7.77e-79
IGLV7-43	ENSG00000211652.2	16.1	5.36	1.427	4.98e-23
FOXA3	ENSG00000170608.2	2.25	0.21	1.425	2.04e-59
LINC01296	ENSG00000244306.9	3.64	0.73	1.423	3.29e-48
RP11-805J14.5	ENSG00000254721.1	10.53	3.3	1.423	2.61e-90
PTK6	ENSG00000101213.6	9.1	2.77	1.422	5.21e-55
QPCT	ENSG00000115828.15	15.44	5.14	1.421	5.22e-35
OR2I1P	ENSG00000237988.3	3.12	0.54	1.42	7.01e-29
TMCO1	ENSG00000143183.16	127.141	46.879	1.42	9.28e-115
BCAS4	ENSG00000124243.17	10.47	3.3	1.415	3.6e-74
STARD10	ENSG00000214530.7	221.167	82.298	1.415	6.16e-72
CEACAM1	ENSG00000079385.21	19.251	6.6	1.414	7.24e-34
FTH1P20	ENSG00000226564.1	19.171	6.58	1.412	3.51e-39
PON3	ENSG00000105852.10	34.35	12.28	1.412	7.02e-28
MNX1-AS1	ENSG00000243479.3	1.66	0	1.411	1.87e-94
ENC1	ENSG00000171617.13	18.79	6.46	1.408	1.83e-56
IGLV1-36	ENSG00000211655.3	7.72	2.29	1.406	1.06e-16
RP11-318C24.1	ENSG00000230777.1	1.65	0	1.406	7.63e-10
PAX9	ENSG00000198807.12	2.44	0.3	1.404	3.04e-53
ABCC3	ENSG00000108846.15	67.751	24.989	1.403	9.71e-32
CYP2J2	ENSG00000134716.9	4.66	1.14	1.403	7.87e-61
FAM83H	ENSG00000180921.6	25.24	8.92	1.403	3.78e-89
C1orf53	ENSG00000203724.10	8.61	2.64	1.401	1.66e-81
RP11-641D5.1	ENSG00000213178.3	301.621	113.574	1.401	1.11e-95
STK32A	ENSG00000169302.14	5.84	1.59	1.401	1.07e-43
CKAP2L	ENSG00000169607.12	2.59	0.36	1.4	2.55e-90
SLC52A3	ENSG00000101276.14	4.33	1.02	1.4	1.61e-62
MXRA5	ENSG00000101825.7	11.74	3.83	1.399	3.2e-33
MALL	ENSG00000144063.3	108.993	40.779	1.397	2.08e-21
SKA3	ENSG00000165480.15	2.53	0.34	1.397	2.61e-104
LRRC15	ENSG00000172061.8	2.73	0.42	1.393	3e-38
TNS4	ENSG00000131746.12	2.73	0.42	1.393	1.72e-35
KIF18B	ENSG00000186185.13	2.99	0.52	1.392	2.18e-71
B4GALNT4	ENSG00000182272.11	3.51	0.72	1.391	1.93e-42
ERBB3	ENSG00000065361.14	72.078	26.891	1.39	2.81e-60
STK39	ENSG00000198648.10	21.919	7.75	1.389	1.32e-78
TSPAN6	ENSG00000000003.14	33.91	12.33	1.389	4.64e-92
CDC25C	ENSG00000158402.18	2.22	0.23	1.388	1.25e-110
KCNK5	ENSG00000164626.8	15.66	5.37	1.387	5.54e-36
HIST1H2BD	ENSG00000158373.8	30.819	11.19	1.384	1.9e-21
RP11-386G11.10	ENSG00000258017.1	99.559	37.53	1.384	3.86e-25
AL450992.2	ENSG00000234614.1	4.66	1.17	1.383	2.63e-78
CD27	ENSG00000139193.3	11.49	3.79	1.383	5.93e-36
C10orf35	ENSG00000171224.8	15.38	5.29	1.381	1.35e-119
CCL22	ENSG00000102962.4	3.81	0.85	1.379	1.15e-34
FBXO32	ENSG00000156804.7	19.99	7.07	1.379	1.28e-55
JCHAIN	ENSG00000132465.10	316.2	121.363	1.374	1.4e-10
CH17-212P11.4	ENSG00000282600.1	1.59	0	1.373	2.73e-46
COL3A1	ENSG00000168542.12	308.622	118.561	1.373	1.41e-27
IRF6	ENSG00000117595.10	19.129	6.77	1.373	4.53e-64
RPL23AP65	ENSG00000243964.1	5.45	1.49	1.373	4.98e-38
B3GNT6	ENSG00000198488.10	1.64	0.02	1.372	1.12e-57
TMEM30B	ENSG00000182107.6	20.97	7.49	1.372	1.32e-51
RCC1	ENSG00000180198.15	32.239	11.85	1.371	6.6e-116
CILP2	ENSG00000160161.9	2.18	0.23	1.37	3.82e-57
ARHGEF35	ENSG00000213214.4	11.12	3.71	1.364	2.05e-39
COA6	ENSG00000168275.14	48.21	18.12	1.364	2.34e-116
ECT2	ENSG00000114346.13	14.5	5.02	1.364	6.27e-80
AMY1C	ENSG00000187733.6	16.45	5.79	1.362	5.76e-11
IGLV7-46	ENSG00000211649.3	19.08	6.82	1.361	1.5e-15
FTH1P7	ENSG00000232187.1	30.02	11.09	1.359	7.66e-43
CST2	ENSG00000170369.3	2.51	0.37	1.357	2.96e-27
IGHV3-66	ENSG00000211972.2	6.57	1.96	1.355	3.83e-20
MINOS1-NBL1	ENSG00000270136.5	5.01	1.35	1.355	1.04e-93
ORC6	ENSG00000091651.8	4.84	1.29	1.351	1.05e-92
F2RL1	ENSG00000164251.4	9.53	3.13	1.35	3.95e-41
SRD5A1	ENSG00000145545.11	8.45	2.71	1.349	1.76e-96
C3orf14	ENSG00000114405.10	20.669	7.52	1.347	1.43e-81
LAGE3	ENSG00000196976.6	44.901	17.05	1.347	6.66e-121
RGS17	ENSG00000091844.7	2.13	0.23	1.347	4.73e-67
EPHB2	ENSG00000133216.16	5.91	1.72	1.345	3.9e-52
RP11-27G14.4	ENSG00000282221.1	2.55	0.4	1.342	1.43e-97
RAD51AP1	ENSG00000111247.14	5.31	1.49	1.341	8.18e-82
AQP3	ENSG00000165272.14	203.925	79.942	1.34	1.06e-15
THY1	ENSG00000154096.13	60.652	23.35	1.34	8.19e-24
AC000089.3	ENSG00000235776.2	2.69	0.46	1.338	7.06e-91
ACY3	ENSG00000132744.7	2.11	0.23	1.338	1.29e-74
SERTAD4	ENSG00000082497.11	4.76	1.28	1.337	5.63e-38
CRYM	ENSG00000103316.10	8.62	2.81	1.336	8.02e-15
IGFL2	ENSG00000204866.8	1.75	0.09	1.335	8.93e-50
BPHL	ENSG00000137274.12	23.441	8.7	1.333	1.83e-117
SPC24	ENSG00000161888.11	4.04	1	1.333	4.6e-76
EHF	ENSG00000135373.12	23.65	8.79	1.332	4.76e-34
CDCP1	ENSG00000163814.7	13.09	4.6	1.331	1.76e-39
EEF1A1P9	ENSG00000249264.1	2.27	0.3	1.331	2.68e-58
KDF1	ENSG00000175707.8	14.8	5.28	1.331	1.39e-107
BZW2	ENSG00000136261.14	62.309	24.19	1.33	5.67e-106
DUXAP8	ENSG00000206195.10	4.63	1.24	1.33	4.37e-37
TNFRSF17	ENSG00000048462.10	3.35	0.73	1.33	1.58e-38
AP1S1	ENSG00000106367.13	64.879	25.221	1.329	1.9e-114
RBBP8NL	ENSG00000130701.3	1.94	0.17	1.329	1.41e-125
SCAMP5	ENSG00000198794.11	6.41	1.95	1.329	3.59e-71
SMIM15	ENSG00000188725.7	37.579	14.37	1.328	9.12e-104
CCT3	ENSG00000163468.14	197.498	78.329	1.323	3.34e-125
PLAU	ENSG00000122861.15	48.789	18.93	1.321	1.37e-40
SSR4	ENSG00000180879.13	706.281	282.811	1.317	6.82e-102
PRSS16	ENSG00000112812.15	18.89	6.99	1.316	1.14e-63
RP11-468E2.1	ENSG00000254692.1	12.58	4.46	1.315	2.11e-34
PPAT	ENSG00000128059.8	6.13	1.87	1.313	1.82e-115
TMEM177	ENSG00000144120.12	10.43	3.6	1.313	7.46e-148
RPL41P2	ENSG00000256338.2	84.559	33.46	1.312	7.9e-54
E2F8	ENSG00000129173.12	2.3	0.33	1.311	6.64e-96
RP5-1061H20.4	ENSG00000177788.5	2.47	0.4	1.31	4.33e-99
HIST2H4A	ENSG00000270882.2	15.97	5.85	1.309	2.2e-57
DNAJC19P9	ENSG00000258608.1	2.59	0.45	1.308	2.35e-49
ZDHHC9	ENSG00000188706.12	64.52	25.46	1.308	1.5e-51
ELF3	ENSG00000163435.15	319.35	128.613	1.305	4.66e-21
STAP2	ENSG00000178078.11	35.299	13.7	1.304	1.05e-82
FEZF1-AS1	ENSG00000230316.6	1.64	0.07	1.303	1.05e-48
NIPSNAP1	ENSG00000184117.11	40.98	16.01	1.303	1.16e-120
RP11-334E6.12	ENSG00000263873.1	17.24	6.4	1.302	3.17e-26
SUGCT	ENSG00000175600.15	4.64	1.29	1.3	2.42e-43
TGFA	ENSG00000163235.15	8.06	2.68	1.3	1.12e-42
CKS2	ENSG00000123975.4	61.452	24.429	1.296	6.22e-68
ARHGEF16	ENSG00000130762.14	15.76	5.83	1.295	3.17e-92
CABYR	ENSG00000154040.20	4.84	1.38	1.295	5.24e-49
FOXP3	ENSG00000049768.14	2.68	0.5	1.295	6.76e-87
TMEM54	ENSG00000121900.18	89.108	35.73	1.295	1.46e-73
CADM4	ENSG00000105767.2	12.4	4.47	1.293	5.39e-59
SPINT1	ENSG00000166145.14	144.006	58.181	1.293	2.76e-76
PRAME	ENSG00000185686.17	1.64	0.08	1.29	4.89e-49
RP11-215A21.2	ENSG00000236058.3	2.35	0.37	1.29	1.48e-90
FAXC	ENSG00000146267.11	8.22	2.78	1.286	5.04e-50
OIP5	ENSG00000104147.8	2.46	0.42	1.285	2.35e-92
RP3-461F17.3	ENSG00000268439.5	17.37	6.55	1.283	5.17e-96
RPL39P3	ENSG00000235174.1	795.71	326.581	1.282	3.19e-35
BEAN1	ENSG00000166546.13	4	1.06	1.279	1.74e-50
CENPW	ENSG00000203760.8	12.73	4.66	1.279	1.95e-63
XXbac-BPG246D15.9	ENSG00000250264.1	5.09	1.51	1.279	3.81e-22
RP11-138I1.4	ENSG00000265401.1	146.798	60.041	1.276	9.21e-41
RPS28P7	ENSG00000227097.5	789.283	325.338	1.276	1.11e-58
STEAP3	ENSG00000115107.19	22.68	8.78	1.276	7.1e-37
PVRL1	ENSG00000110400.10	9.94	3.52	1.275	6.91e-62
MMP15	ENSG00000102996.4	24.71	9.63	1.274	5.55e-58
OVOL1	ENSG00000172818.9	2.24	0.34	1.274	2.96e-84
RNASEH2A	ENSG00000104889.4	23.011	8.95	1.271	5.31e-95
FUCA1	ENSG00000179163.11	64.601	26.199	1.27	3.99e-51
IGHA1	ENSG00000211895.4	2239.72	928.977	1.269	8.49e-16
ENO1	ENSG00000074800.13	1257.29	521.78	1.267	3.88e-84
DCAF13	ENSG00000164934.13	32.41	12.89	1.266	6.68e-107
DNAH14	ENSG00000185842.14	8.55	2.97	1.266	3.02e-102
ENTPD3	ENSG00000168032.8	5.11	1.54	1.266	8.33e-31
IGLV5-45	ENSG00000211650.2	8.57	2.98	1.266	7.63e-17
ISG15	ENSG00000187608.8	127.432	52.388	1.266	6.53e-37
PMAIP1	ENSG00000141682.11	8.88	3.11	1.265	3.21e-35
ITGA11	ENSG00000137809.16	4.62	1.34	1.264	5.89e-45
PITX2	ENSG00000164093.15	1.4	0	1.263	3.04e-56
RP11-1223D19.2	ENSG00000282785.1	1.4	0	1.263	1.05e-21
SLC41A2	ENSG00000136052.9	11.95	4.4	1.262	2.45e-65
ARSD	ENSG00000006756.15	32.039	12.79	1.261	6.44e-46
EFNA5	ENSG00000184349.12	8.06	2.78	1.261	8.2e-54
STMN1	ENSG00000117632.20	140.516	58.032	1.261	1.68e-58
TFB2M	ENSG00000162851.7	16.04	6.11	1.261	3.27e-120
RPL35P1	ENSG00000237991.3	3.09	0.71	1.258	1.7e-52
CCNF	ENSG00000162063.12	4.73	1.4	1.255	4.34e-102
FGL1	ENSG00000104760.16	2.39	0.42	1.255	1.88e-32
AP001631.9	ENSG00000236663.1	1.79	0.17	1.254	2.94e-63
CTA-384D8.34	ENSG00000273272.1	6.13	1.99	1.254	8.08e-45
SLC16A9	ENSG00000165449.11	2.96	0.66	1.254	9.32e-44
CTD-2619J13.13	ENSG00000268307.1	2.55	0.49	1.253	1.18e-42
GOLGA7B	ENSG00000155265.10	3.22	0.77	1.253	1.27e-61
ARNTL2	ENSG00000029153.14	5.12	1.57	1.252	6.31e-43
PCP4L1	ENSG00000248485.1	8.24	2.88	1.252	8.07e-17
GSTA1	ENSG00000243955.5	8.26	2.89	1.251	3.26e-06
KIF23	ENSG00000137807.13	6.57	2.18	1.251	2.05e-59
SGOL1	ENSG00000129810.14	2.07	0.29	1.251	8.52e-97
IGHV1-58	ENSG00000211968.3	2.78	0.59	1.249	1.13e-24
AC093850.2	ENSG00000230838.1	1.68	0.13	1.246	3.07e-62
TBCAP1	ENSG00000226781.1	2.13	0.32	1.246	3.29e-70
GPRIN1	ENSG00000169258.6	2.39	0.43	1.245	1.58e-79
UGDH	ENSG00000109814.11	39.341	16.02	1.245	1.49e-54
TNNT1	ENSG00000105048.16	10.24	3.75	1.243	1.62e-16
CANT1	ENSG00000171302.16	48.819	20.06	1.242	4.45e-92
RP11-76C10.6	ENSG00000280002.1	3.92	1.08	1.242	7.51e-19
PC	ENSG00000173599.13	18.23	7.14	1.24	5.49e-77
WDR66	ENSG00000158023.9	6.91	2.35	1.24	4.44e-20
CTC-518P12.6	ENSG00000267484.1	1.36	0	1.239	3.24e-37
DNAJB13	ENSG00000187726.8	3.98	1.11	1.239	4.93e-11
RP11-334C17.6	ENSG00000275479.1	1.36	0	1.239	1.07e-08
RHPN2	ENSG00000131941.7	11.01	4.09	1.238	2e-55
PAK6	ENSG00000259288.5	4.94	1.52	1.237	9.93e-84
RPP40	ENSG00000124787.13	7.37	2.55	1.237	1.27e-91
BCAS1	ENSG00000064787.12	3.59	0.95	1.235	7.39e-25
RP13-582O9.7	ENSG00000272172.1	1.35	0	1.233	1.66e-27
CLDN10	ENSG00000134873.9	5.06	1.58	1.232	5.43e-30
APOA1BP	ENSG00000163382.11	134.503	56.712	1.231	2.56e-119
DNAJC22	ENSG00000178401.14	1.79	0.19	1.229	1.91e-58
MRPS33	ENSG00000090263.15	75.861	31.8	1.229	1.04e-115
LAMC2	ENSG00000058085.14	36.45	15.009	1.226	6e-19
TMPRSS11E	ENSG00000087128.9	1.41	0.03	1.226	5.04e-52
IGLC6	ENSG00000222037.5	2.11	0.33	1.225	1.64e-33
CTB-191K22.5	ENSG00000267815.1	27.561	11.23	1.224	1.06e-17
AC005538.3	ENSG00000279809.1	1.66	0.14	1.222	1.88e-67
S100A14	ENSG00000189334.8	181.445	77.197	1.222	4.21e-24
PSMG3	ENSG00000157778.8	59.601	24.989	1.221	9.34e-112
CTD-2224J9.4	ENSG00000241434.1	1.33	0	1.22	0.00189
PFN2	ENSG00000070087.13	47.14	19.67	1.22	4.16e-34
STYXL1	ENSG00000127952.16	55.66	23.34	1.219	9.31e-100
DDR1	ENSG00000204580.11	107.09	45.55	1.215	4.22e-54
HOXB7	ENSG00000260027.4	7.66	2.73	1.215	1.17e-28
PDGFRL	ENSG00000104213.12	8.84	3.24	1.215	4.22e-41
KIF12	ENSG00000136883.12	4.29	1.28	1.214	3.04e-30
NXT2	ENSG00000101888.11	10.76	4.07	1.214	1.16e-73
RP11-76C10.5	ENSG00000256151.1	2.78	0.63	1.214	7.11e-20
CLDN2	ENSG00000165376.10	1.62	0.13	1.213	1.55e-23
DSC2	ENSG00000134755.14	9.21	3.41	1.211	2.95e-45
MCM10	ENSG00000065328.16	1.94	0.27	1.211	1.83e-82
METTL1	ENSG00000037897.16	34.35	14.27	1.211	7.22e-78
PTPRF	ENSG00000142949.16	87.571	37.291	1.21	3.76e-62
CTD-2325P2.4	ENSG00000259038.1	1.31	0	1.208	1.01e-29
DGCR5	ENSG00000237517.8	1.68	0.16	1.208	1.74e-75
MUC13	ENSG00000173702.7	1.68	0.16	1.208	2.05e-33
AC005943.2	ENSG00000267059.2	1.47	0.07	1.207	1.03e-07
EXOSC5	ENSG00000077348.8	22.389	9.14	1.206	8.7e-110
PRSS8	ENSG00000052344.15	166.202	71.51	1.205	6.81e-38
MAP7D2	ENSG00000184368.15	1.88	0.25	1.204	1.51e-50
IGKV2-30	ENSG00000243238.1	25	10.29	1.203	3.83e-11
LYPD3	ENSG00000124466.8	4.87	1.55	1.203	1.65e-46
SKA1	ENSG00000154839.9	1.9	0.26	1.203	2.98e-85
TMEM105	ENSG00000185332.6	2.5	0.52	1.203	4.61e-74
SNRPE	ENSG00000182004.12	156.964	67.662	1.202	7.59e-118
DNAH2	ENSG00000183914.14	2.77	0.64	1.201	1.38e-16
GJB3	ENSG00000188910.7	2.33	0.45	1.199	1.05e-33
FGF11	ENSG00000161958.10	3.52	0.97	1.198	7.68e-61
KRT19	ENSG00000171345.13	600.532	261.233	1.198	3.27e-35
CCNE1	ENSG00000105173.13	4.02	1.19	1.197	7.7e-69
PSENEN	ENSG00000205155.7	141.503	61.141	1.197	5.33e-83
EPHX4	ENSG00000172031.6	2.3	0.44	1.196	3.49e-64
P3H4	ENSG00000141696.12	17.08	6.89	1.196	1.41e-66
AC145343.2	ENSG00000265055.1	2	0.31	1.195	2.61e-92
PPIL1	ENSG00000137168.7	28.259	11.78	1.195	4.49e-92
PTMAP5	ENSG00000214182.5	10.4	3.98	1.195	2.3e-36
CXCR3	ENSG00000186810.7	3.69	1.05	1.194	1.19e-37
SLC12A8	ENSG00000221955.10	10.3	3.94	1.194	6.99e-74
C2orf15	ENSG00000273045.5	3.48	0.96	1.193	1.56e-101
KRT15	ENSG00000171346.13	18.05	7.34	1.192	4.36e-21
MAGED1	ENSG00000179222.17	122.47	53.079	1.191	3.64e-84
RP11-294C11.2	ENSG00000278263.2	1.28	0	1.189	3.18e-42
RPL10P3	ENSG00000230734.1	1.28	0	1.189	1.44e-55
GGH	ENSG00000137563.11	18.621	7.62	1.187	1.99e-42
RAD54L	ENSG00000085999.11	3.35	0.91	1.187	1.13e-70
RP11-465N4.4	ENSG00000234678.1	5.83	2	1.187	3.91e-82
ZACN	ENSG00000186919.12	8.2	3.04	1.187	2.85e-20
BRI3BP	ENSG00000184992.10	5.62	1.91	1.186	1.52e-105
SDHAF3	ENSG00000196636.7	20.281	8.36	1.185	3.87e-100
PTGFRN	ENSG00000134247.9	28.789	12.11	1.184	1.4e-58
LDHA	ENSG00000134333.13	674.979	296.789	1.183	2.71e-61
CDCA2	ENSG00000184661.13	1.95	0.3	1.182	1.29e-89
LINC00857	ENSG00000237523.1	3.04	0.78	1.182	1.34e-99
OLA1	ENSG00000138430.15	77.272	33.49	1.182	1.66e-117
GPR39	ENSG00000183840.6	10.09	3.89	1.181	6.83e-48
GSDMC	ENSG00000147697.8	2.31	0.46	1.181	1.13e-43
LRRC20	ENSG00000172731.13	12.94	5.15	1.181	1.84e-87
GNPNAT1	ENSG00000100522.8	15.56	6.31	1.18	3.2e-81
KIAA1522	ENSG00000162522.10	49.81	21.421	1.18	2.41e-68
HAMP	ENSG00000105697.7	2.94	0.74	1.179	4.22e-27
RPL7P1	ENSG00000214485.6	44.169	18.95	1.179	1.33e-33
LINC00665	ENSG00000232677.6	11.06	4.33	1.178	3.25e-26
MAP7	ENSG00000135525.18	13	5.19	1.177	1.7e-65
MSH2	ENSG00000095002.12	13.87	5.58	1.176	1.49e-92
RHOD	ENSG00000173156.6	25.53	10.74	1.176	1.18e-63
MISP	ENSG00000099812.8	25.04	10.54	1.174	1.17e-29
TOM1L1	ENSG00000141198.13	35.661	15.26	1.173	4.01e-77
GSKIP	ENSG00000100744.14	17.52	7.22	1.172	2.57e-85
VSIG1	ENSG00000101842.13	1.86	0.27	1.171	1.16e-26
CTD-3010D24.3	ENSG00000263893.2	1.25	0	1.17	1.99e-79
UBE2S	ENSG00000108106.13	32.239	13.77	1.17	7.83e-70
XKR9	ENSG00000221947.7	2.17	0.41	1.169	8.37e-58
DDIT4L	ENSG00000145358.6	2.39	0.51	1.167	2.63e-50
POSTN	ENSG00000133110.14	73.409	32.13	1.167	3.62e-23
FAAH2	ENSG00000165591.6	11.44	4.55	1.164	1.26e-58
FRMD5	ENSG00000171877.19	1.6	0.16	1.164	4.95e-86
KIF15	ENSG00000163808.16	2.54	0.58	1.164	3.61e-78
EIF2AK1	ENSG00000086232.12	79.192	34.811	1.163	6.91e-126
IGKV1-37	ENSG00000239862.1	1.24	0	1.163	1.39e-32
MTATP8P1	ENSG00000240409.1	1.24	0	1.163	1.13e-11
RP11-295G20.2	ENSG00000233461.5	13.41	5.44	1.162	4.43e-55
IGHV3-13	ENSG00000211942.3	5.26	1.8	1.161	1.74e-18
SEMA4B	ENSG00000185033.14	61.452	26.921	1.161	7.16e-47
THOC3	ENSG00000051596.9	30.399	13.05	1.16	6.38e-97
CD2AP	ENSG00000198087.7	25.95	11.07	1.159	5.83e-72
RP11-61N20.3	ENSG00000226268.3	4	1.24	1.158	8.03e-64
POC1A	ENSG00000164087.7	5.4	1.87	1.157	4.38e-96
RN7SL4P	ENSG00000263740.2	1.23	0	1.157	1.32e-25
POLE2	ENSG00000100479.12	4.84	1.62	1.156	6.32e-77
SHCBP1	ENSG00000171241.8	3.77	1.14	1.156	5.28e-71
PDCD2L	ENSG00000126249.7	11.38	4.56	1.155	3.88e-119
SEL1L3	ENSG00000091490.10	72.932	32.21	1.155	1.84e-69
GOLPH3L	ENSG00000143457.10	28.47	12.24	1.154	2.25e-73
SCIN	ENSG00000006747.14	10.33	4.09	1.154	3.61e-27
SRCIN1	ENSG00000277363.4	4.92	1.66	1.154	7.86e-32
MREG	ENSG00000118242.15	11.94	4.82	1.153	4.04e-61
MRPL15	ENSG00000137547.8	55.379	24.35	1.153	1.21e-104
TMEM14A	ENSG00000096092.5	33.639	14.58	1.153	9.83e-79
LACTB2	ENSG00000147592.8	31.349	13.56	1.152	1.63e-72
CMBL	ENSG00000164237.8	21.01	8.91	1.151	2.78e-29
DCTPP1	ENSG00000179958.8	41.3	18.05	1.151	5.54e-90
RP11-173P15.5	ENSG00000256569.1	1.22	0	1.151	9.2e-09
RPL41	ENSG00000279483.1	4148.29	1867.38	1.151	1.07e-64
BPNT1	ENSG00000162813.17	25.109	10.78	1.148	3.23e-87
CTD-2015H6.3	ENSG00000249042.5	7.09	2.65	1.148	2.95e-93
TMEM132A	ENSG00000006118.14	22.55	9.63	1.148	3.65e-42
C3orf67	ENSG00000163689.18	1.9	0.31	1.147	2.08e-61
LAMP5	ENSG00000125869.9	2.5	0.58	1.147	3.9e-41
NME2	ENSG00000011052.21	19.51	8.26	1.147	2.59e-43
NCAPG2	ENSG00000146918.19	8.32	3.22	1.143	4.71e-73
MACC1	ENSG00000183742.12	7.05	2.65	1.141	1.94e-28
AP1S3	ENSG00000152056.16	6.78	2.53	1.14	3.57e-37
BYSL	ENSG00000112578.9	18.04	7.64	1.14	8.1e-79
GALE	ENSG00000117308.14	71.52	31.91	1.14	4.72e-77
GOLT1A	ENSG00000174567.7	19.471	8.29	1.14	1.03e-36
QPRT	ENSG00000103485.17	26.051	11.28	1.139	2.73e-24
SMIM14	ENSG00000163683.11	44.381	19.61	1.139	1.85e-60
AC009005.2	ENSG00000267751.5	4.15	1.34	1.138	1.51e-58
HIST1H4J	ENSG00000197238.4	9.12	3.6	1.138	7.81e-51
OVOL2	ENSG00000125850.10	9.85	3.93	1.138	5.78e-67
IDH2	ENSG00000182054.9	99.981	45.029	1.133	9.06e-93
NREP	ENSG00000134986.13	31.321	13.75	1.132	8.39e-44
RP11-12G12.7	ENSG00000274605.1	5.53	1.98	1.132	1.29e-72
TMED10	ENSG00000170348.8	207.446	94.078	1.132	2.44e-83
OAS1	ENSG00000089127.12	48.809	21.739	1.131	1.53e-42
TFF1	ENSG00000160182.2	1.19	0	1.131	3.24e-30
ERGIC2	ENSG00000087502.17	66.178	29.691	1.13	8.49e-91
GAPDH	ENSG00000111640.14	2508.31	1145.37	1.13	4.27e-68
RASEF	ENSG00000165105.9	8.36	3.28	1.129	1.09e-41
FAM83A-AS1	ENSG00000204949.8	1.25	0.03	1.127	6.01e-80
SLC52A2	ENSG00000185803.8	57.551	25.829	1.126	1.62e-95
CD1A	ENSG00000158477.6	1.66	0.22	1.125	1.19e-23
ARL6IP1	ENSG00000170540.14	124.309	56.48	1.124	2.32e-88
IGKV5-2	ENSG00000211599.2	2.77	0.73	1.124	5.85e-17
MROH6	ENSG00000204839.8	22.969	10	1.124	5.12e-32
RPL35P5	ENSG00000225573.4	7.65	2.97	1.124	1.06e-48
POF1B	ENSG00000124429.17	2.42	0.57	1.123	2.35e-27
COMP	ENSG00000105664.10	10.32	4.2	1.122	1.82e-14
PRC1	ENSG00000198901.13	19.7	8.52	1.121	7.57e-54
CENPH	ENSG00000153044.9	6.89	2.63	1.12	7.94e-93
KPNA7	ENSG00000185467.7	1.65	0.22	1.119	9.11e-69
LTB	ENSG00000227507.2	21.24	9.24	1.119	2.13e-19
PYCRL	ENSG00000104524.13	10.77	4.42	1.119	5.2e-90
TACSTD2	ENSG00000184292.6	148.456	67.869	1.118	1.72e-26
HELLS	ENSG00000119969.14	4.51	1.54	1.117	1.23e-70
MIS18A	ENSG00000159055.3	8.74	3.49	1.117	1.47e-110
SPAG5	ENSG00000076382.16	14.74	6.26	1.116	8.28e-57
TMED2	ENSG00000086598.10	176.203	80.839	1.115	8.02e-91
MAFG-AS1	ENSG00000265688.1	4.67	1.62	1.114	2.47e-85
CENPN	ENSG00000166451.13	10.05	4.11	1.113	7.86e-69
HTR3A	ENSG00000166736.11	1.25	0.04	1.113	5.14e-49
LMNB1	ENSG00000113368.11	19.01	8.25	1.113	6.86e-57
PLA2G4A	ENSG00000116711.9	11.63	4.84	1.113	4.04e-29
SRP9	ENSG00000143742.12	229.364	105.506	1.113	6.94e-96
LYPLA1	ENSG00000120992.17	50.649	22.89	1.112	1.64e-81
PRSS22	ENSG00000005001.9	24.87	10.97	1.112	6.54e-25
RP11-440D17.3	ENSG00000272913.1	7.02	2.71	1.112	2.31e-84
EEF1A1P12	ENSG00000214199.3	1.83	0.31	1.111	3.2e-50
SFRP4	ENSG00000106483.11	21.88	9.6	1.11	1.34e-08
IGLV9-49	ENSG00000223350.2	5.86	2.18	1.109	4.18e-17
MRPS23	ENSG00000181610.12	59.531	27.07	1.109	1.36e-93
PGM2L1	ENSG00000165434.7	4.76	1.67	1.109	1.63e-69
RP11-676M6.1	ENSG00000254612.2	4.07	1.35	1.109	5.64e-47
AC005083.1	ENSG00000233834.6	5.64	2.08	1.108	1.11e-48
CR2	ENSG00000117322.16	1.37	0.1	1.107	1.39e-34
IGKV1D-8	ENSG00000239819.2	1.52	0.17	1.107	8.56e-38
SUMO1P3	ENSG00000235082.2	4.38	1.5	1.106	1.07e-44
PRPS2	ENSG00000101911.12	24.721	10.96	1.105	6.26e-86
CT83	ENSG00000204019.4	1.15	0	1.104	2.77e-43
DPY30	ENSG00000162961.13	99.76	45.87	1.104	1.46e-112
HIST1H2BK	ENSG00000197903.7	115.351	53.131	1.104	1.34e-43
LINC01207	ENSG00000248771.5	1.3	0.07	1.104	3.08e-33
RP11-567G11.1	ENSG00000228952.1	1.15	0	1.104	1.62e-39
FAM178B	ENSG00000168754.13	2.48	0.62	1.103	1.58e-52
TMC5	ENSG00000103534.16	46.019	20.89	1.103	2.2e-21
ARHGEF19	ENSG00000142632.16	17.19	7.48	1.101	9.7e-59
IGHA2	ENSG00000211890.3	187.623	86.942	1.101	1.14e-14
MRPL3	ENSG00000114686.8	71.749	32.91	1.101	3.75e-102
SPIB	ENSG00000269404.6	2.26	0.52	1.101	7.6e-28
LSM12P1	ENSG00000232024.2	12.29	5.2	1.1	1.13e-62
SNRPD1	ENSG00000167088.10	74.459	34.21	1.1	5.5e-94
TMEM9	ENSG00000116857.16	115.119	53.219	1.099	6.69e-82
YWHAZ	ENSG00000164924.17	439.92	204.846	1.099	2.2e-84
CCT5	ENSG00000150753.11	189.505	87.991	1.098	1.51e-76
CENPK	ENSG00000123219.12	4.8	1.71	1.098	1.18e-64
IGHV3-20	ENSG00000211946.3	2.31	0.55	1.095	1.77e-21
PSPH	ENSG00000146733.13	9.96	4.13	1.095	5.07e-61
RPA3	ENSG00000106399.11	40.461	18.42	1.094	1.21e-82
CISD2	ENSG00000145354.9	27.21	12.22	1.093	3.72e-98
FANCF	ENSG00000183161.4	5.4	2	1.093	1.81e-124
RAB38	ENSG00000123892.11	10.94	4.6	1.092	3.77e-39
SFXN1	ENSG00000164466.12	17.55	7.7	1.092	4.82e-82
FABP6	ENSG00000170231.15	4.58	1.62	1.091	2.72e-06
GALNT4	ENSG00000257594.3	5.41	2.01	1.091	6.93e-55
PVT1	ENSG00000249859.7	22.27	9.92	1.091	5.12e-29
MRPL12	ENSG00000262814.6	76.68	35.5	1.09	1e-90
E2F1	ENSG00000101412.12	8.51	3.47	1.089	1.23e-61
FGG	ENSG00000171557.16	30.26	13.7	1.089	0.000344
H1F0	ENSG00000189060.5	152.81	71.302	1.089	8.91e-62
SFXN4	ENSG00000183605.16	24.429	10.96	1.088	9.24e-112
BZW1P2	ENSG00000198406.7	18.67	8.26	1.087	3.45e-30
PPAPDC1A	ENSG00000203805.10	1.38	0.12	1.087	2.94e-53
RALGPS2	ENSG00000116191.17	5.86	2.23	1.087	5.98e-66
RP11-345J4.5	ENSG00000261740.5	28.291	12.79	1.087	3.21e-83
MTX2	ENSG00000128654.13	39.65	18.15	1.086	5.55e-118
NKX2-1-AS1	ENSG00000253563.2	5.77	2.19	1.086	4.39e-29
WNT3	ENSG00000108379.9	3.31	1.03	1.086	1.61e-70
C17orf58	ENSG00000186665.8	10.94	4.63	1.085	4.21e-96
BCL9	ENSG00000116128.9	11.55	4.92	1.084	4.41e-67
BTF3L4P2	ENSG00000213189.5	45.241	20.81	1.084	3.25e-82
CTD-2510F5.4	ENSG00000265415.1	1.69	0.27	1.083	3.58e-68
TMEM63C	ENSG00000165548.10	1.73	0.29	1.082	8.95e-47
ERBB2	ENSG00000141736.13	85.407	39.849	1.081	4.63e-44
P4HB	ENSG00000185624.14	883.446	417.114	1.081	2.1e-93
PLEKHN1	ENSG00000187583.10	3.4	1.08	1.081	4.4e-71
BSPRY	ENSG00000119411.10	15.93	7.01	1.08	7.51e-68
DLG3	ENSG00000082458.11	19.821	8.85	1.08	1e-88
ADAM12	ENSG00000148848.14	2.76	0.78	1.079	1.46e-37
CPXM1	ENSG00000088882.7	4.98	1.83	1.079	3.98e-14
HOOK1	ENSG00000134709.10	8.12	3.32	1.078	3.56e-71
ANKEF1	ENSG00000132623.15	3.49	1.13	1.076	2.15e-75
IGLV2-18	ENSG00000211664.2	6.9	2.75	1.075	5.37e-12
PCSK1N	ENSG00000102109.8	5.55	2.11	1.075	1.83e-16
OR7E14P	ENSG00000184669.7	3.59	1.18	1.074	6.46e-60
TRIM31	ENSG00000204616.10	1.61	0.24	1.074	2.11e-39
SLC9A7	ENSG00000065923.9	3.88	1.32	1.073	1.51e-71
BDH1	ENSG00000161267.11	16.6	7.38	1.071	6.59e-54
YBX2	ENSG00000006047.12	1.71	0.29	1.071	3.11e-52
FOXD3-AS1	ENSG00000230798.5	1.1	0	1.07	4.62e-45
MB	ENSG00000198125.12	7.92	3.25	1.07	9.56e-23
DARS2	ENSG00000117593.9	12.24	5.31	1.069	1.81e-101
TSTA3	ENSG00000104522.15	98.379	46.41	1.068	2.03e-87
CXCL17	ENSG00000189377.8	278.261	132.339	1.067	4.32e-12
JUP	ENSG00000173801.16	145.602	68.969	1.067	2.25e-57
ENTPD8	ENSG00000188833.9	1.28	0.09	1.065	5.04e-68
TMC4	ENSG00000167608.11	61.002	28.64	1.065	1.18e-42
SUMO1P4	ENSG00000235555.1	1.09	0	1.064	2.59e-36
PPP1R1B	ENSG00000131771.13	24.841	11.37	1.063	6.21e-06
WDHD1	ENSG00000198554.11	4.37	1.57	1.063	5.11e-50
CLSPN	ENSG00000092853.13	2.09	0.48	1.062	2.72e-65
DEGS2	ENSG00000168350.7	4.47	1.62	1.062	5.97e-12
HACD3	ENSG00000074696.12	43.329	20.25	1.061	2.83e-71
LRRC8E	ENSG00000171017.10	4.99	1.87	1.061	3.59e-68
SPCS2P4	ENSG00000228589.3	39.91	18.61	1.061	1.19e-74
ABHD11	ENSG00000106077.18	47.081	22.06	1.06	1.21e-64
AGA	ENSG00000038002.8	23.02	10.53	1.059	6.92e-64
BRIX1	ENSG00000113460.12	32.91	15.28	1.059	1.08e-93
MRPL24	ENSG00000143314.12	91.651	43.51	1.058	1.39e-88
DIO2	ENSG00000211448.11	1.85	0.37	1.057	2.95e-42
FBXO16	ENSG00000214050.7	3.91	1.36	1.057	4.81e-74
RPLP0P6	ENSG00000213553.4	26.051	12	1.057	1.03e-54
ATIC	ENSG00000138363.14	96.448	45.87	1.056	1.41e-93
PHKA1	ENSG00000067177.14	4.8	1.79	1.056	2.43e-94
BOLA2	ENSG00000183336.7	14.79	6.6	1.055	9.47e-66
PLD4	ENSG00000166428.12	3.03	0.94	1.055	1.54e-22
IGHV3-72	ENSG00000225698.3	7.24	2.97	1.054	8.93e-14
GMDS	ENSG00000112699.10	26.25	12.13	1.053	9.82e-69
MNX1	ENSG00000130675.14	1.2	0.06	1.053	1.63e-64
MYCBP	ENSG00000214114.8	24.48	11.28	1.053	4.47e-76
PTRH2	ENSG00000141378.14	29.29	13.6	1.053	5.41e-89
GEMIN6	ENSG00000152147.10	12.51	5.52	1.051	8.31e-109
NUP62CL	ENSG00000198088.10	2.75	0.81	1.051	1.51e-47
PAK1	ENSG00000149269.9	38.449	18.04	1.051	5.61e-71
LIMK1	ENSG00000106683.14	32.219	15.04	1.05	7.58e-66
UBXN10	ENSG00000162543.5	4.05	1.44	1.049	4.15e-07
CCL19	ENSG00000172724.11	32.17	15.05	1.047	0.000642
MIF	ENSG00000240972.1	467.071	225.658	1.046	8.07e-63
CDCA4	ENSG00000170779.10	9.11	3.9	1.045	3.11e-88
PARPBP	ENSG00000185480.11	3.25	1.06	1.045	4.66e-76
TMEM33	ENSG00000109133.12	25.64	11.91	1.045	4.58e-82
RBM47	ENSG00000163694.14	38.04	17.95	1.043	6.04e-57
AC009299.3	ENSG00000227403.1	3.98	1.42	1.041	7.34e-44
STIL	ENSG00000123473.15	2.41	0.66	1.039	1.55e-91
ENPP5	ENSG00000112796.9	10.31	4.51	1.038	1.61e-26
PDIA6	ENSG00000143870.12	227.574	110.43	1.037	8.23e-75
DTYMK	ENSG00000168393.12	28.809	13.54	1.036	1.33e-93
STAT1	ENSG00000115415.18	92.199	44.479	1.035	3.46e-36
MRPS35	ENSG00000061794.12	41.521	19.76	1.034	2.99e-88
RP5-864K19.6	ENSG00000274944.4	1.17	0.06	1.034	7.68e-43
TSPAN5	ENSG00000168785.7	9.81	4.28	1.034	3.23e-39
TUBB2B	ENSG00000137285.9	3.69	1.29	1.034	1.1e-29
CD207	ENSG00000116031.8	1.64	0.29	1.033	7.16e-17
PDZD11	ENSG00000120509.10	52.439	25.13	1.032	1.37e-120
C6orf132	ENSG00000188112.8	13.85	6.27	1.03	1.65e-46
CASP6	ENSG00000138794.9	22.841	10.68	1.029	1.23e-94
NUDT1	ENSG00000106268.15	30.37	14.37	1.029	5.69e-90
TWF1	ENSG00000151239.13	46.6	22.33	1.029	5.8e-80
ADORA2B	ENSG00000170425.3	6.81	2.83	1.028	4.09e-43
PLK4	ENSG00000142731.10	3.69	1.3	1.028	9.87e-68
UNC5CL	ENSG00000124602.9	5.22	2.05	1.028	9.74e-37
AC007009.1	ENSG00000244239.1	4.95	1.92	1.027	2.58e-37
ROMO1	ENSG00000125995.15	234.882	114.737	1.027	1.18e-80
FAM213A	ENSG00000122378.13	41.42	19.83	1.026	1.2e-83
RP11-519G16.5	ENSG00000259342.1	1.24	0.1	1.026	8.84e-49
GDPD1	ENSG00000153982.10	3.74	1.33	1.025	8.41e-65
PABPC1	ENSG00000070756.13	1229.28	603.369	1.025	1.35e-71
CENPI	ENSG00000102384.13	2.03	0.49	1.024	1.1e-79
ORC1	ENSG00000085840.12	2.05	0.5	1.024	3.05e-77
SHFM1	ENSG00000127922.9	240.483	117.759	1.024	1.06e-93
AC016292.3	ENSG00000108958.4	2.51	0.73	1.021	1.91e-74
TXNDC5	ENSG00000239264.8	148.507	72.73	1.02	1.92e-50
FAM103A2P	ENSG00000235272.1	8.44	3.66	1.018	8.85e-34
C12orf45	ENSG00000151131.9	25.12	11.91	1.017	1.33e-105
MRPL17	ENSG00000158042.8	68.759	33.469	1.017	2.45e-89
PIGU	ENSG00000101464.10	25.34	12.03	1.015	4.97e-107
RP11-78A19.3	ENSG00000267165.1	24.02	11.38	1.015	2.9e-31
HLA-DQB2	ENSG00000232629.8	24.87	11.81	1.014	3.87e-05
IGKV3-7	ENSG00000243063.1	1.02	0	1.014	4.48e-45
TRUB1	ENSG00000165832.5	9.01	3.96	1.013	1.83e-78
VTCN1	ENSG00000134258.16	1.18	0.08	1.013	3.84e-36
ARHGAP11A	ENSG00000198826.10	3.64	1.3	1.012	5.64e-59
C17orf53	ENSG00000125319.14	2.53	0.75	1.012	1.1e-76
OPN3	ENSG00000054277.12	23.591	11.19	1.012	8.53e-33
FCGBP	ENSG00000275395.4	4.1	1.53	1.011	2.87e-13
FCRLA	ENSG00000132185.16	1.68	0.33	1.011	4.43e-37
HPRT1	ENSG00000165704.14	31.741	15.25	1.011	5.69e-70
CENPL	ENSG00000120334.15	4.94	1.95	1.01	4.25e-95
FANCI	ENSG00000140525.17	8.06	3.5	1.01	1.6e-60
KLHDC7A	ENSG00000179023.8	2.02	0.5	1.01	8.12e-26
THNSL1	ENSG00000185875.12	3.23	1.1	1.01	1.13e-108
RP11-49K24.6	ENSG00000267228.6	2.68	0.83	1.008	1.34e-12
TONSL	ENSG00000160949.16	4.41	1.69	1.008	3.91e-76
TPBG	ENSG00000146242.8	14.79	6.85	1.008	1.93e-37
CHAF1B	ENSG00000159259.7	3.18	1.08	1.007	8.27e-88
RP11-465B22.3	ENSG00000217801.9	4.93	1.95	1.007	8.49e-52
AC112229.1	ENSG00000230650.1	1.63	0.31	1.006	2.92e-48
BATF	ENSG00000156127.6	16.939	7.93	1.006	4.05e-31
MZT2A	ENSG00000173272.13	75.248	36.99	1.005	3.93e-74
TBX15	ENSG00000092607.13	1.93	0.46	1.005	9.45e-44
LRRC61	ENSG00000127399.14	13.53	6.25	1.003	7.05e-72
SAMD10	ENSG00000130590.13	7.44	3.21	1.003	1.67e-81
C19orf48	ENSG00000167747.13	31.12	15.04	1.002	1.76e-75
DHFR	ENSG00000228716.6	11.18	5.08	1.002	1.04e-86
FSTL4	ENSG00000053108.16	2.22	0.61	1	1.36e-32
LY6D	ENSG00000167656.4	1.7	0.35	1	1.89e-32
WBSCR27	ENSG00000165171.10	6.12	2.56	1	3.61e-24

## Sheet: Upregulated miRNAs' target gene
name	Symbol
hsa-miR-1225-5p	NR1H4
hsa-miR-1225-5p	CHTF8
hsa-miR-1225-5p	NID2
hsa-miR-1225-5p	PCDHGB7
hsa-miR-1225-5p	PPP2R2C
hsa-miR-1225-5p	PCDHGA11
hsa-miR-1225-5p	BCL2L2
hsa-miR-1225-5p	CSMD3
hsa-miR-1225-5p	MTUS2
hsa-miR-1225-5p	NUP153
hsa-miR-1225-5p	CXCL8
hsa-miR-1225-5p	EDC3
hsa-miR-1225-5p	FNDC4
hsa-miR-1225-5p	PCDHGA8
hsa-miR-1225-5p	MAP3K11
hsa-miR-1225-5p	FGF2
hsa-miR-1225-5p	NDEL1
hsa-miR-1225-5p	FUS
hsa-miR-1225-5p	MMP14
hsa-miR-1225-5p	AMMECR1
hsa-miR-1225-5p	PCDHGB4
hsa-miR-1225-5p	SLMAP
hsa-miR-1225-5p	GABRB3
hsa-miR-1225-5p	PDE7B
hsa-miR-1225-5p	PCDHGA1
hsa-miR-1225-5p	BNC2
hsa-miR-1225-5p	PCDHGC3
hsa-miR-1225-5p	CHGB
hsa-miR-1225-5p	BARX2
hsa-miR-1225-5p	BCL7B
hsa-miR-1225-5p	FGF11
hsa-miR-1225-5p	PSME4
hsa-miR-1225-5p	MED13
hsa-miR-1225-5p	GNAO1
hsa-miR-1225-5p	SEMA4D
hsa-miR-1225-5p	BEND4
hsa-miR-1225-5p	PCDHGA6
hsa-miR-1225-5p	IQGAP2
hsa-miR-1225-5p	SEMA6D
hsa-miR-1225-5p	RAPGEFL1
hsa-miR-1225-5p	KCNK1
hsa-miR-1225-5p	PCDHGA7
hsa-miR-1225-5p	ZBBX
hsa-miR-1225-5p	IGSF3
hsa-miR-1225-5p	SLITRK1
hsa-miR-1225-5p	PCDHGA9
hsa-miR-1225-5p	IRS1
hsa-miR-1225-5p	FBLN5
hsa-miR-1225-5p	UVRAG
hsa-miR-1225-5p	PCDHGB1
hsa-miR-1225-5p	ELMO2
hsa-miR-1225-5p	IP6K3
hsa-miR-1225-5p	PITPNA
hsa-miR-1225-5p	AMIGO1
hsa-miR-1225-5p	TANC2
hsa-miR-1225-5p	KIAA0196
hsa-miR-1225-5p	MTMR2
hsa-miR-1225-5p	ELN
hsa-miR-1225-5p	L1CAM
hsa-miR-1225-5p	REEP1
hsa-miR-1225-5p	SAMD8
hsa-miR-1225-5p	HTR2C
hsa-miR-1225-5p	PEG10
hsa-miR-1225-5p	ZCCHC12
hsa-miR-1225-5p	FBXL20
hsa-miR-1225-5p	PRPF40A
hsa-miR-1225-5p	PCDHGA5
hsa-miR-1225-5p	YLPM1
hsa-miR-1225-5p	GNA13
hsa-miR-1225-5p	PCDHGC5
hsa-miR-1225-5p	PCDHGA10
hsa-miR-1225-5p	ZC3H13
hsa-miR-1225-5p	ZNF185
hsa-miR-1225-5p	DCTN4
hsa-miR-1225-5p	LSM5
hsa-miR-1225-5p	RMI1
hsa-miR-1225-5p	DOC2A
hsa-miR-1225-5p	NSMAF
hsa-miR-1225-5p	ACVR1
hsa-miR-1225-5p	PCDHGB2
hsa-miR-1225-5p	PLTP
hsa-miR-1225-5p	PCDHGA2
hsa-miR-1225-5p	KIF18A
hsa-miR-1225-5p	PCDHGA12
hsa-miR-1225-5p	BCL2L11
hsa-miR-1225-5p	ARFGEF1
hsa-miR-1225-5p	PCDHGB3
hsa-miR-1225-5p	PPP1R3D
hsa-miR-1225-5p	ARHGAP18
hsa-miR-1225-5p	KIAA1324
hsa-miR-1225-5p	LCA5
hsa-miR-1225-5p	NIPA1
hsa-miR-1225-5p	SNURF
hsa-miR-1225-5p	PCDHGB6
hsa-miR-1225-5p	MYO18A
hsa-miR-1225-5p	SLC39A10
hsa-miR-1225-5p	SLC39A13
hsa-miR-1225-5p	ZNF793
hsa-miR-1225-5p	ETV1
hsa-miR-1225-5p	FNDC3B
hsa-miR-1225-5p	IFT80
hsa-miR-1225-5p	ELOVL2
hsa-miR-1225-5p	MEOX2
hsa-miR-1225-5p	FAM46A
hsa-miR-1225-5p	TAL1
hsa-miR-1225-5p	SLC5A9
hsa-miR-1225-5p	GTDC1
hsa-miR-1225-5p	MEMO1
hsa-miR-1225-5p	METTL15
hsa-miR-1225-5p	ATXN7L3
hsa-miR-1225-5p	SLC4A1
hsa-miR-1225-5p	ZBTB24
hsa-miR-1225-5p	MAP3K3
hsa-miR-1225-5p	RNF212
hsa-miR-1225-5p	ZNF449
hsa-miR-1225-5p	NCOA3
hsa-miR-1225-5p	BRMS1L
hsa-miR-1225-5p	PABPC4
hsa-miR-1225-5p	PCDHGA4
hsa-miR-1225-5p	PCDHGA3
hsa-miR-1225-5p	CHST3
hsa-miR-1225-5p	NFAT5
hsa-miR-1225-5p	CSMD2
hsa-miR-1225-5p	ARHGAP21
hsa-miR-1225-5p	SASH1
hsa-miR-1225-5p	SLC38A2
hsa-miR-1225-5p	KCNN3
hsa-miR-1225-5p	PCDHGC4
hsa-miR-1225-5p	NAA30
hsa-miR-1225-5p	PEG3
hsa-miR-1225-5p	BBS5
hsa-miR-1225-5p	44443
hsa-miR-1225-5p	TSPAN3
hsa-miR-1225-5p	IGDCC3
hsa-miR-1225-5p	ADAMTS17
hsa-miR-1225-5p	RREB1
hsa-miR-1225-5p	KIAA2022
hsa-miR-1225-5p	NICN1
hsa-miR-1225-5p	WASL
hsa-miR-1225-5p	TRPS1
hsa-miR-1225-5p	ANP32A
hsa-miR-1225-5p	ST6GAL1
hsa-miR-1225-5p	FAM46C
hsa-miR-1225-5p	GPR137C
hsa-miR-1225-5p	RIMKLB
hsa-miR-1225-5p	SNX7
hsa-miR-1225-5p	ZC3H12C
hsa-miR-575	ABCD3
hsa-miR-575	GPD2
hsa-miR-575	SDC4
hsa-miR-575	P2RY14
hsa-miR-575	DPP8
hsa-miR-575	VCPIP1
hsa-miR-575	CHRD
hsa-miR-575	PRKCE
hsa-miR-575	ZNF318
hsa-miR-575	PIGK
hsa-miR-575	PRRG3
hsa-miR-575	IKZF4
hsa-miR-575	GUCY2C
hsa-miR-575	CPNE8
hsa-miR-575	DYNC1LI2
hsa-miR-575	CHST14
hsa-miR-575	TSG101
hsa-miR-575	NRK
hsa-miR-575	MEAF6
hsa-miR-575	C9orf72
hsa-miR-575	PAPOLB
hsa-miR-575	MRVI1
hsa-miR-575	NEGR1
hsa-miR-575	MAP3K1
hsa-miR-575	KCNJ11
hsa-miR-575	ATXN7L3
hsa-miR-575	VASP
hsa-miR-575	LHX4
hsa-miR-575	PEX5L
hsa-miR-575	SNAPIN
hsa-miR-575	ZNF516
hsa-miR-575	IGLON5
hsa-miR-575	CHL1
hsa-miR-575	ZNF48
hsa-miR-575	PREX1
hsa-miR-575	FAM81A
hsa-miR-575	ZNF609
hsa-miR-575	SEH1L
hsa-miR-575	SEC24C
hsa-miR-575	EIF2AK3
hsa-miR-575	ARID1B
hsa-miR-575	TP53INP2
hsa-miR-575	WNK1
hsa-miR-575	KCNA1
hsa-miR-575	WSB2
hsa-miR-575	TMEM182
hsa-miR-575	SETD7
hsa-miR-575	NEMP1
hsa-miR-575	RAP1A
hsa-miR-575	PCDH19
hsa-miR-575	SNX16
hsa-miR-575	SLC2A10
hsa-miR-575	LEMD3
hsa-miR-575	SLC35F1
hsa-miR-575	GRPEL2
hsa-miR-575	TSC22D1
hsa-miR-575	SRR
hsa-miR-575	CSMD3
hsa-miR-575	EPC2
hsa-miR-575	CPEB3
hsa-miR-575	SPEN
hsa-miR-575	ANKRD46
hsa-miR-575	ATXN7L1
hsa-miR-575	AGAP2
hsa-miR-575	MAP2K1
hsa-miR-575	BCL9
hsa-miR-575	OTUD5
hsa-miR-575	ATP2A2
hsa-miR-575	SLC6A6
hsa-miR-575	TMEM267
hsa-miR-575	SLC24A3
hsa-miR-575	DNAJB14
hsa-miR-575	TANC2
hsa-miR-575	EFNB3
hsa-miR-575	CDC7
hsa-miR-575	GALNT1
hsa-miR-575	VTI1A
hsa-miR-575	SLC4A4
hsa-miR-575	NRP2
hsa-miR-575	SACS
hsa-miR-575	TYW5
hsa-miR-575	SPAST
hsa-miR-575	CD40
hsa-miR-575	IFT22
hsa-miR-575	KCND1
hsa-miR-575	BAALC
hsa-miR-575	PRDM1
hsa-miR-575	RB1CC1
hsa-miR-575	PHTF2
hsa-miR-575	EDA2R
hsa-miR-575	NEUROG1
hsa-miR-575	NXPH1
hsa-miR-575	PTBP2
hsa-miR-575	CTNND1
hsa-miR-575	NPY2R
hsa-miR-575	LRRTM2
hsa-miR-575	CAMK2N2
hsa-miR-575	YPEL5
hsa-miR-575	EXT1
hsa-miR-575	TPT1
hsa-miR-575	NPNT
hsa-miR-575	FBXW11
hsa-miR-575	ANKRD23
hsa-miR-575	MAP2
hsa-miR-575	BDNF
hsa-miR-575	MTMR6
hsa-miR-575	RTKN2
hsa-miR-575	NDEL1
hsa-miR-575	DRP2
hsa-miR-575	YTHDC1
hsa-miR-575	KCND2
hsa-miR-575	SS18L1
hsa-miR-575	DENND5A
hsa-miR-575	ZYG11B

## Sheet: The ceRNA network
lncRNA	miRNA	mRNA
LINC00467	hsa-miR-1225-5p	BARX2
LINC00467	hsa-miR-575	BCL9
LINC00467	hsa-miR-1225-5p	KCNK1
LINC00467	hsa-miR-1225-5p	KIAA1324
LINC00467	hsa-miR-575	TMEM182
